# Supplementary material for: Pd(ii), Ni(ii), and Cu(ii) complexes of α,α′-ditolylmethanone dipyrroethene
Source: Royal Society of Chemistry journal article supplement (doi:10.1039/d3dt00476g), 2023-01-01
Supplement: d3dt00476g1.pdf [file d3dt00476g1.pdf]

## Supporting Information

### **Pd(II), Ni(II), and Cu(II) complexes of $\alpha,\alpha'$ -Ditolylmethanone Dipyrroethene**

Poornenth Pushpanandan, Kanhu Charan Behera and Mangalampalli Ravikanth\*

Indian Institute of Technology, Powai, Mumbai, 400076, India, Fax:91-22-5723480;

Tel: 91-22-5767176; E-mail: [ravikanth@chem.iitb.ac.in](mailto:ravikanth@chem.iitb.ac.in)

---

| Sl. no | Details                                                                                                    | Page no. |
|--------|------------------------------------------------------------------------------------------------------------|----------|
| 1      | <b>Figure S1-S3.</b> Characterization data of <b>Pd-4</b>                                                  | S2-S4    |
| 2      | <b>Figure S4-S6.</b> Characterization data of <b>Ni-4</b>                                                  | S5-S7    |
| 3      | <b>Figure S7.</b> Characterization data of <b>Cu-4</b>                                                     | S8       |
| 4      | <b>Figure S8-S14, Table S1-S7.</b> X-ray crystal data of <b>Pd-4, Ni-4</b> and <b>Cu-4</b>                 | S19-S28  |
| 5      | <b>Table S8.</b> Electrochemical data                                                                      | S29      |
| 6      | <b>Figure S15-S17, Table S9-11.</b> DFT optimized structure and data of <b>Pd-4, Ni-4</b> and <b>Cu-4</b>  | S30-S38  |
| 7      | <b>Figure S18-S20, Tables S12-14.</b> Td-DFT transition data of Compound <b>Pd-4, Ni-4</b> and <b>Cu-4</b> | S39-S63  |
| 8      | <b>Figure S21-23, Table S15-17.</b> Catalysis studies                                                      | S64-S70  |

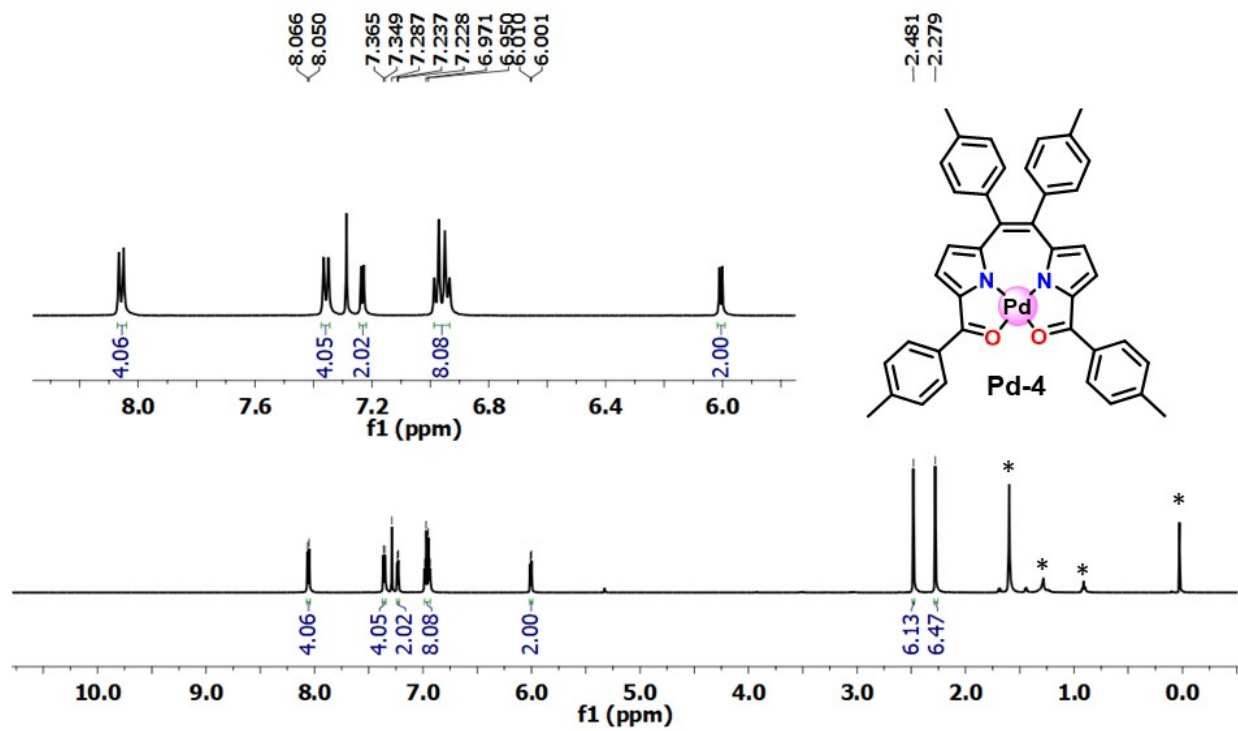

**Figure S1.**  $^1\text{H-NMR}$  spectrum of **Pd-4** in  $\text{CDCl}_3$  at room temperature. Note: Peaks marked with asterisk (\*) are due to residual solvents.

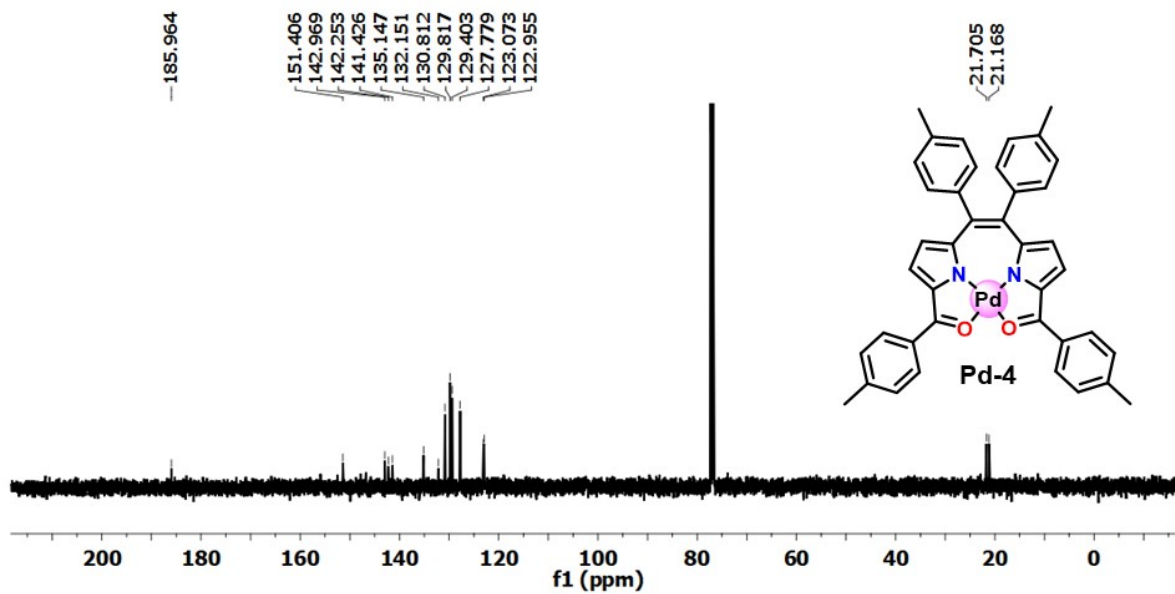

**Figure S2.**  $^{13}\text{C}$ -NMR spectrum of Pd-4 in  $\text{CDCl}_3$  at room temperature.

---

DEPARTMENT OF CHEMISTRY, I.I.T.

---

**Analysis Info**

|               |                               |      |
|---------------|-------------------------------|------|
| Analysis Name | D:\Data\SEP-2022\MR-PRP-PD1.d | Acq  |
| Method        | Naformat_pos_1000B.m          | Op   |
| Sample Name   | MR-PRP-PD1                    | Inst |
| Comment       | C40H32N2O2Pd                  |      |

---

**Acquisition Parameter**

|             |            |                      |          |
|-------------|------------|----------------------|----------|
| Source Type | ESI        | Ion Polarity         | Positive |
| Focus       | Not active | Set Capillary        | 3700 V   |
| Scan Begin  | 50 m/z     | Set End Plate Offset | -500 V   |
| Scan End    | 1000 m/z   | Set Charging Voltage | 2000 V   |
|             |            | Set Corona           | 0 nA     |

---

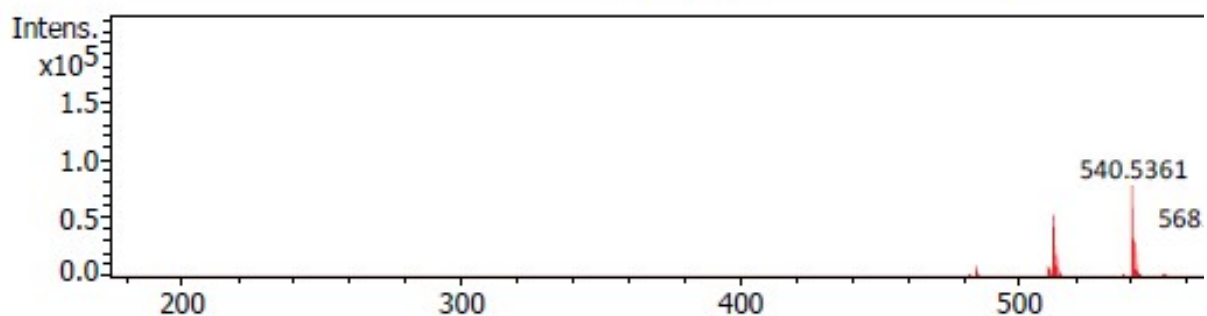

**Figure S3.** High resolution mass spectrum of **Pd-4**.

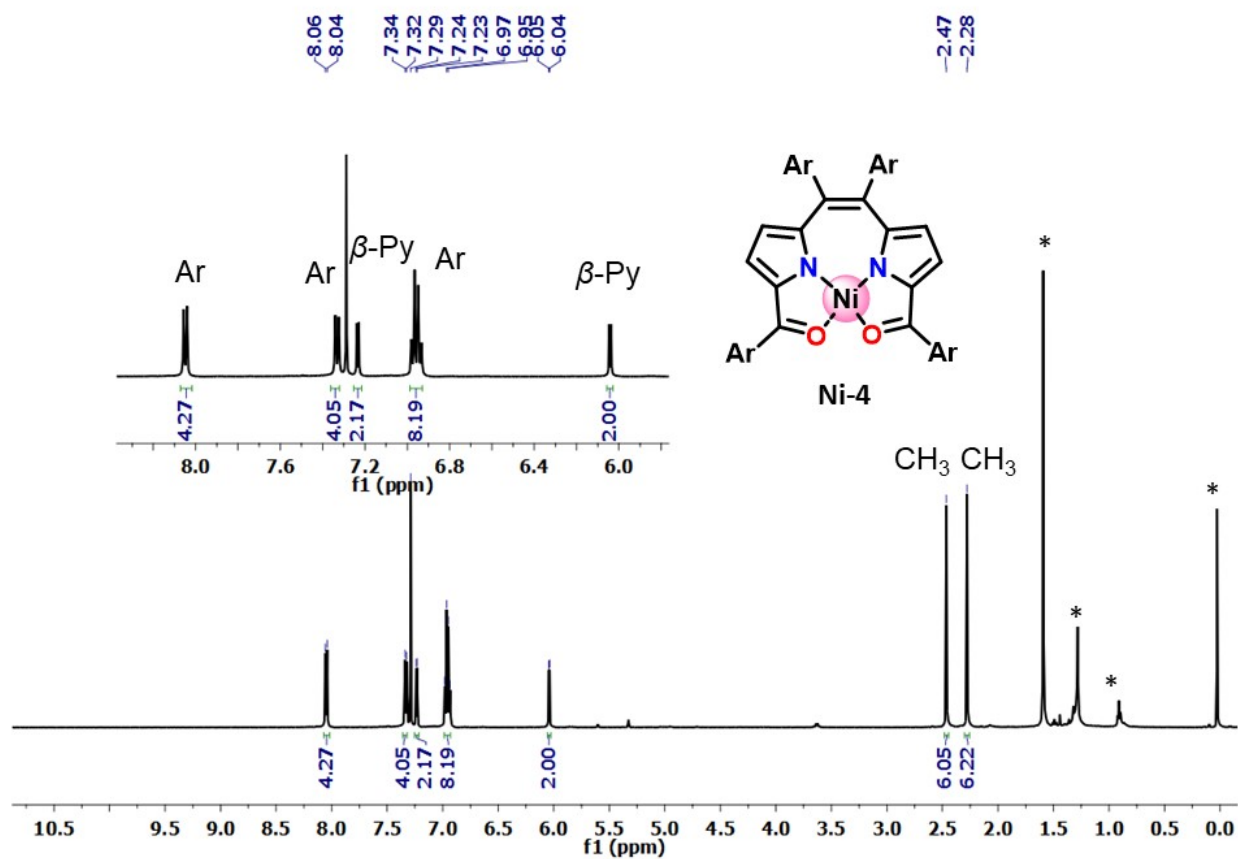

**Figure S4.** <sup>1</sup>H-NMR spectrum of Ni-4 in CDCl<sub>3</sub> at room temperature. Note: Peaks marked with asterisk (\*) are due to residual solvents.

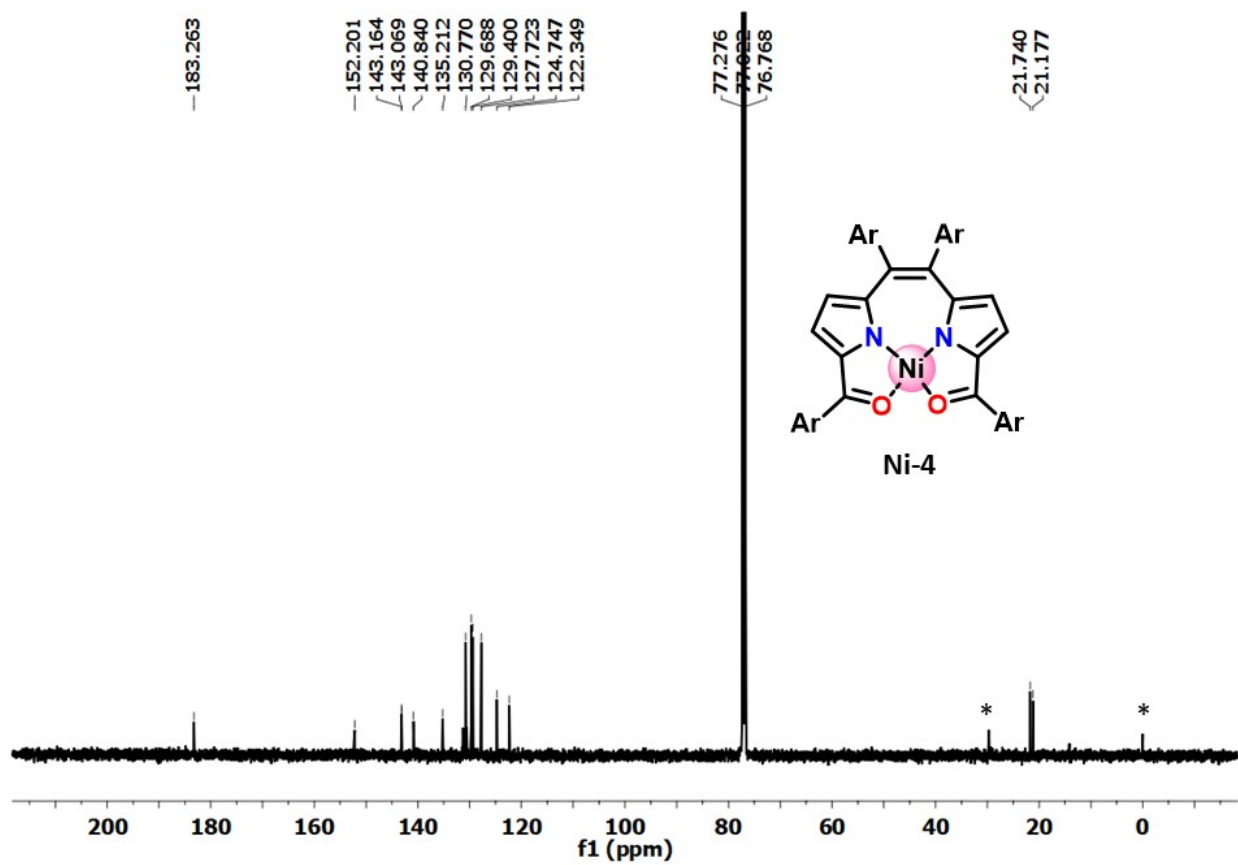

**Figure S5.**  $^{13}\text{C}$ -NMR spectrum of Ni-4 in  $\text{CDCl}_3$  on at room temperature.

---

DEPARTMENT OF CHEMISTRY, I.I.T

---

**Analysis Info**

|               |                              |       |
|---------------|------------------------------|-------|
| Analysis Name | D:\Data\DEC-2022\MR-PRP-NI.d | Acq   |
| Method        | NaICsI_pos_1000.m            | Ope   |
| Sample Name   | MR-PRP-NI                    | Instr |
| Comment       | C40H32N2NiO2                 |       |

---

**Acquisition Parameter**

|             |            |                      |          |
|-------------|------------|----------------------|----------|
| Source Type | ESI        | Ion Polarity         | Positive |
| Focus       | Not active | Set Capillary        | 3700 V   |
| Scan Begin  | 50 m/z     | Set End Plate Offset | -500 V   |
| Scan End    | 1000 m/z   | Set Charging Voltage | 2000 V   |
|             |            | Set Corona           | 0 nA     |

---

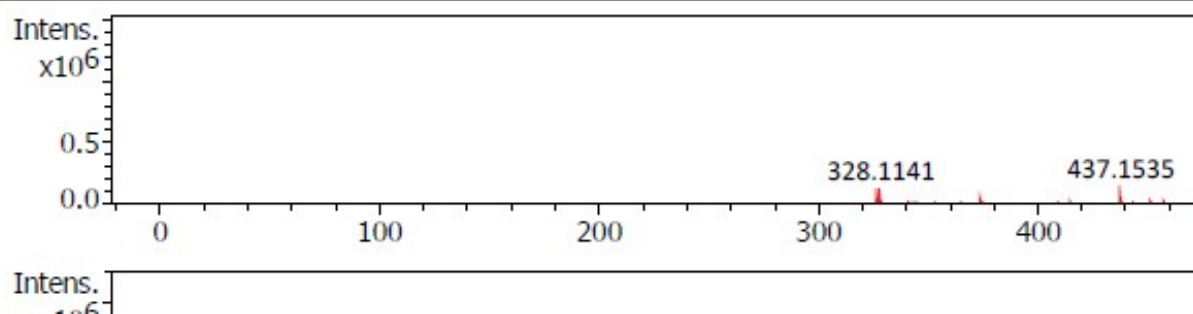

**Figure S6.** High resolution mass spectrum of Ni-4.

---

DEPARTMENT OF CHEMISTRY, I.I.T

---

**Analysis Info**

|               |                              |       |
|---------------|------------------------------|-------|
| Analysis Name | D:\Data\NOV-2022\MR-PRP-CU.d | Acq   |
| Method        | Naformat_pos_1000a.m         | Ope   |
| Sample Name   | MR-PRP-CU                    | Instr |
| Comment       | C40H32N2O2Cu                 |       |

---

**Acquisition Parameter**

|             |            |                      |          |
|-------------|------------|----------------------|----------|
| Source Type | ESI        | Ion Polarity         | Positive |
| Focus       | Not active | Set Capillary        | 3700 V   |
| Scan Begin  | 50 m/z     | Set End Plate Offset | -500 V   |
| Scan End    | 1000 m/z   | Set Charging Voltage | 2000 V   |
|             |            | Set Corona           | 0 nA     |

---

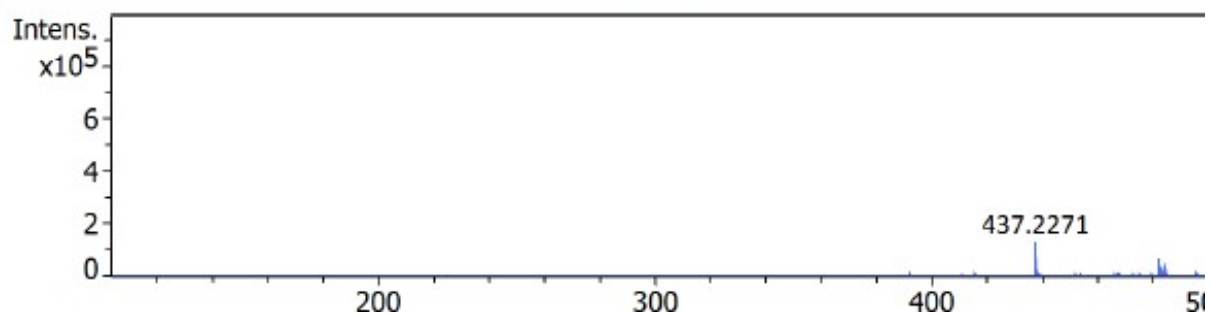

**Figure S7.** High resolution mass spectrum of **Cu-4**.



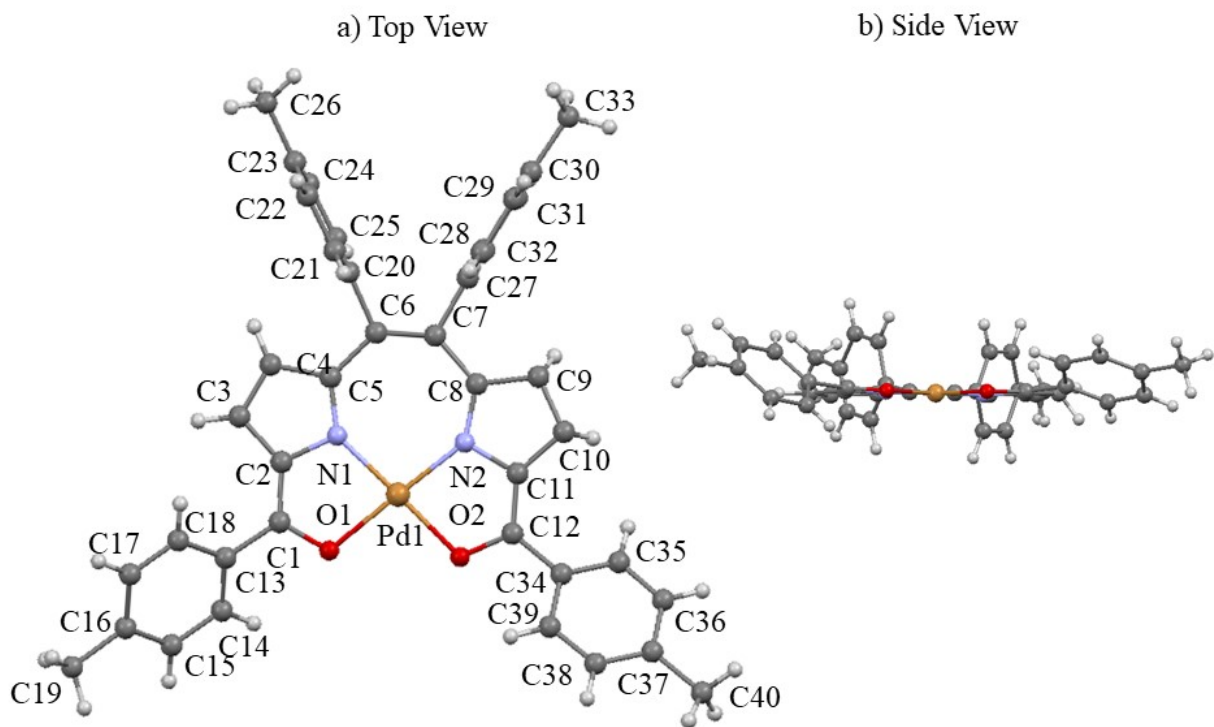

**Figure S8.** X-ray crystallographic structure (a) Top view and (b) Side view of **Pd-4**.

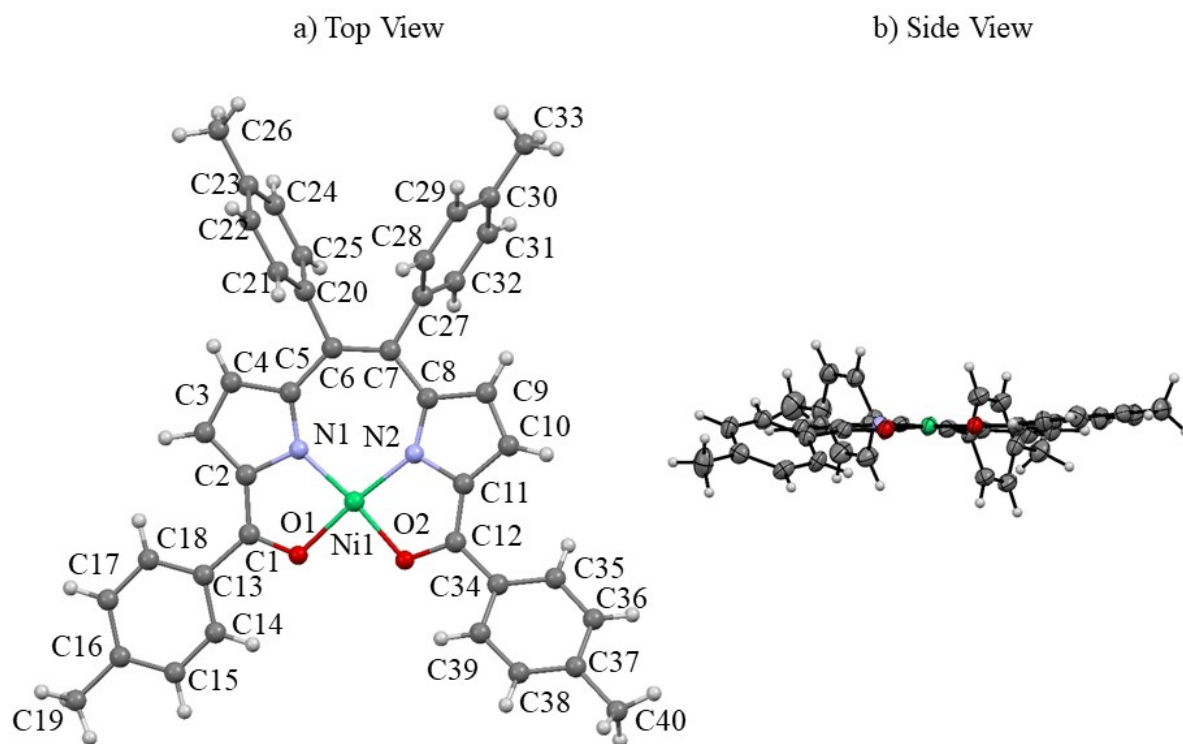

**Figure S9.** X-ray crystallographic structure (a) Top view and (b) Side view of Ni-4.

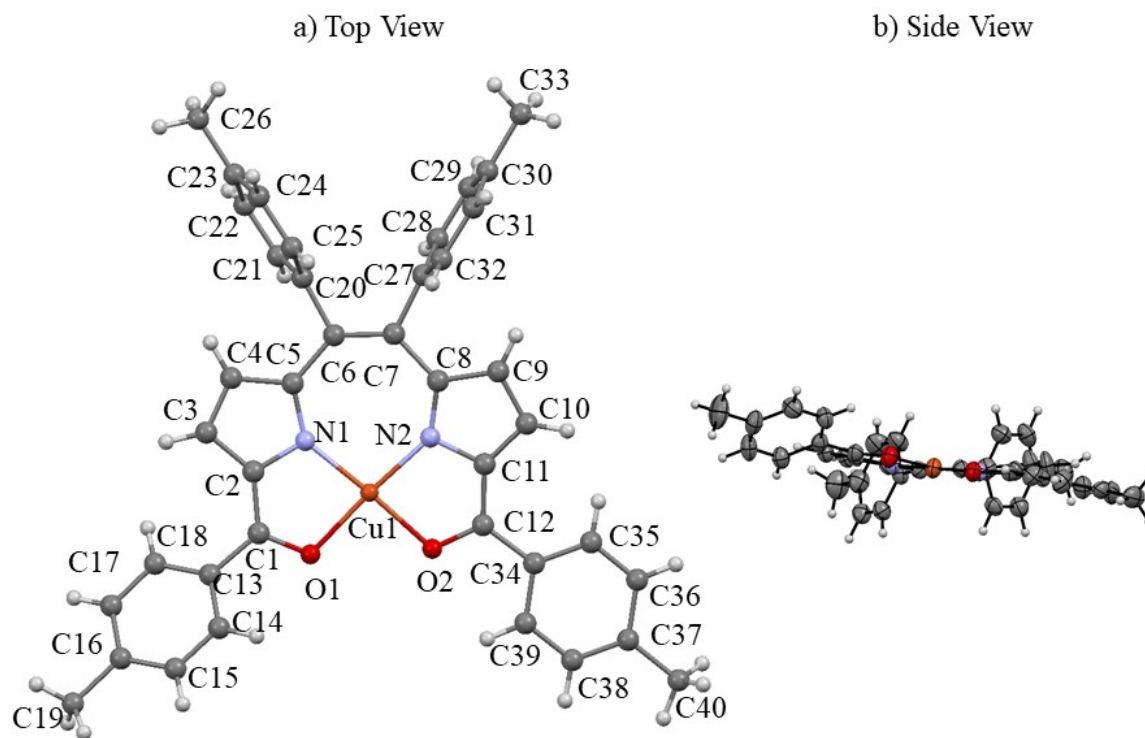

**Figure S10.** X-ray crystallographic structure (a) Top view and (b) Side view of **Cu-4**.

**Table S1.** Crystal data and structure refinement for **Pd-4**, **Ni-4** and **Cu-4**.

| Compound                                    | <b>Pd-4</b>                                                      | <b>Ni-4</b>                                                      | <b>Cu-4</b>                                                      |
|---------------------------------------------|------------------------------------------------------------------|------------------------------------------------------------------|------------------------------------------------------------------|
| Empirical Formula                           | C <sub>40</sub> H <sub>32</sub> N <sub>2</sub> O <sub>2</sub> Pd | C <sub>40</sub> H <sub>32</sub> N <sub>2</sub> O <sub>2</sub> Ni | C <sub>40</sub> H <sub>32</sub> N <sub>2</sub> O <sub>2</sub> Cu |
| Crystal System                              | triclinic                                                        | triclinic                                                        | triclinic                                                        |
| Space Group                                 | P-1                                                              | P-1                                                              | P-1                                                              |
| $R_1$ ( $I > 2.00\sigma(I)$ )               | 0.0438                                                           | 0.0583                                                           | 0.0637                                                           |
| $wR_2$ (All reflections)                    | 0.1321                                                           | 0.1659                                                           | 0.1850                                                           |
| GOF                                         | 1.111                                                            | 1.029                                                            | 1.064                                                            |
| $a$ [Å]                                     | 11.4482(4)                                                       | 9.8300(5)                                                        | 9.694(5)                                                         |
| $b$ [Å]                                     | 11.8734(5)                                                       | 11.2853(6)                                                       | 11.558(6)                                                        |
| $c$ [Å]                                     | 12.9557(5)                                                       | 14.8021(6)                                                       | 14.779(8)                                                        |
| $\alpha$ [°]                                | 81.174(4)                                                        | 96.813(4)                                                        | 98.82(2)                                                         |
| $\beta$ [°]                                 | 65.549(4)                                                        | 106.561(4)                                                       | 103.760(18)                                                      |
| $\gamma$ [°]                                | 88.541(3)                                                        | 96.781(4)                                                        | 97.860(18)                                                       |
| $V$ [Å <sup>3</sup> ]                       | 1582.72(12)                                                      | 1542.80(13)                                                      | 1563.3(14)                                                       |
| $Z$                                         | 2                                                                | 2                                                                | 2                                                                |
| $T$ [K]                                     | 150                                                              | 100                                                              | 150                                                              |
| $\delta_{\text{calc}}$ [g/cm <sup>3</sup> ] | 1.425                                                            | 1.359                                                            | 1.352                                                            |
| $F_{000}$                                   | 696                                                              | 660.0                                                            | 662                                                              |
| $2\theta_{\text{max}}$ [°]                  | 49.99                                                            | 50                                                               | 50                                                               |
| no. reflns measd.<br>(unique)               | 27860                                                            | 56131                                                            | 35132                                                            |
| no. params.                                 | 416                                                              | 410                                                              | 410                                                              |
| <b>CCDC no.</b>                             | 2196178                                                          | 2233882                                                          | 2233881                                                          |

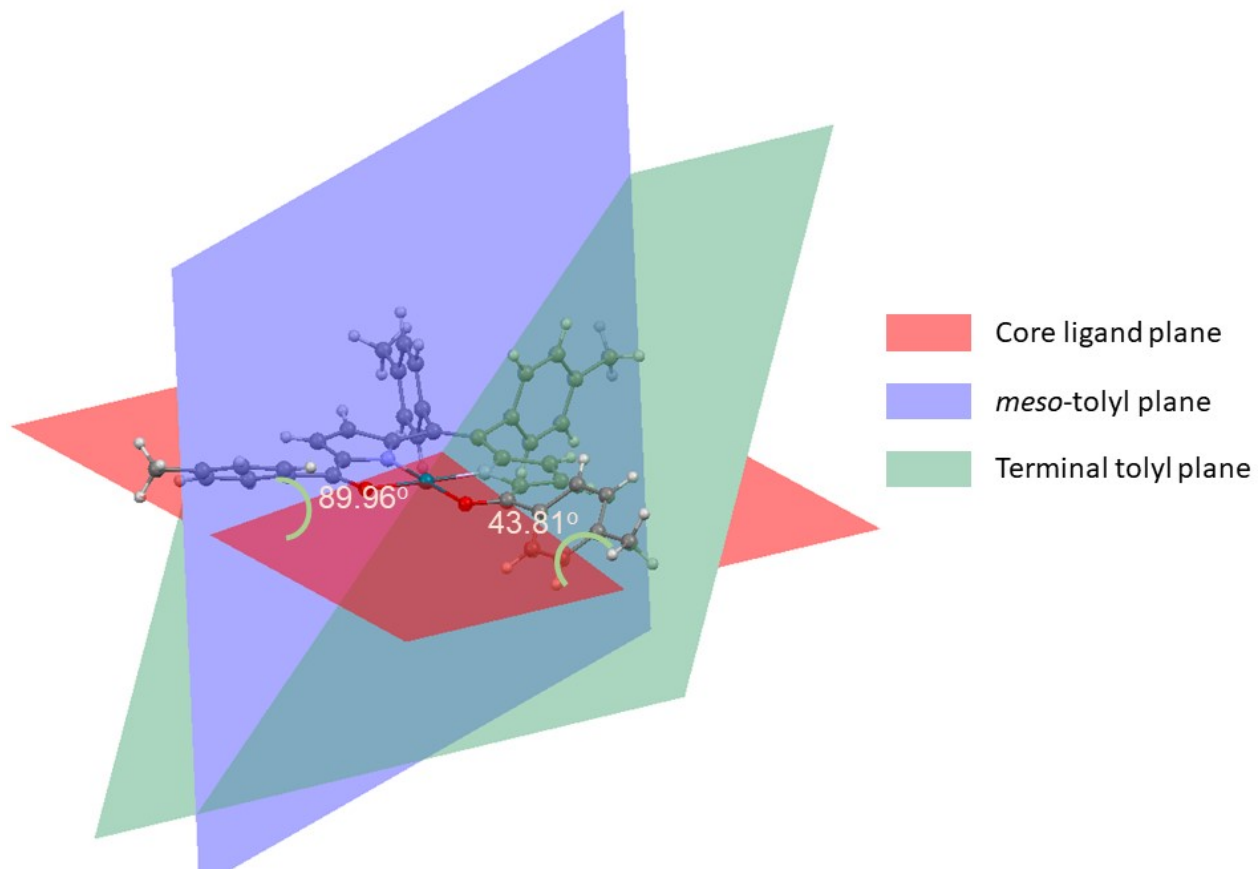

**Figure S11.** Angle made by the terminal and *meso*-tolyl groups with the ligand plane of **Pd-4**.

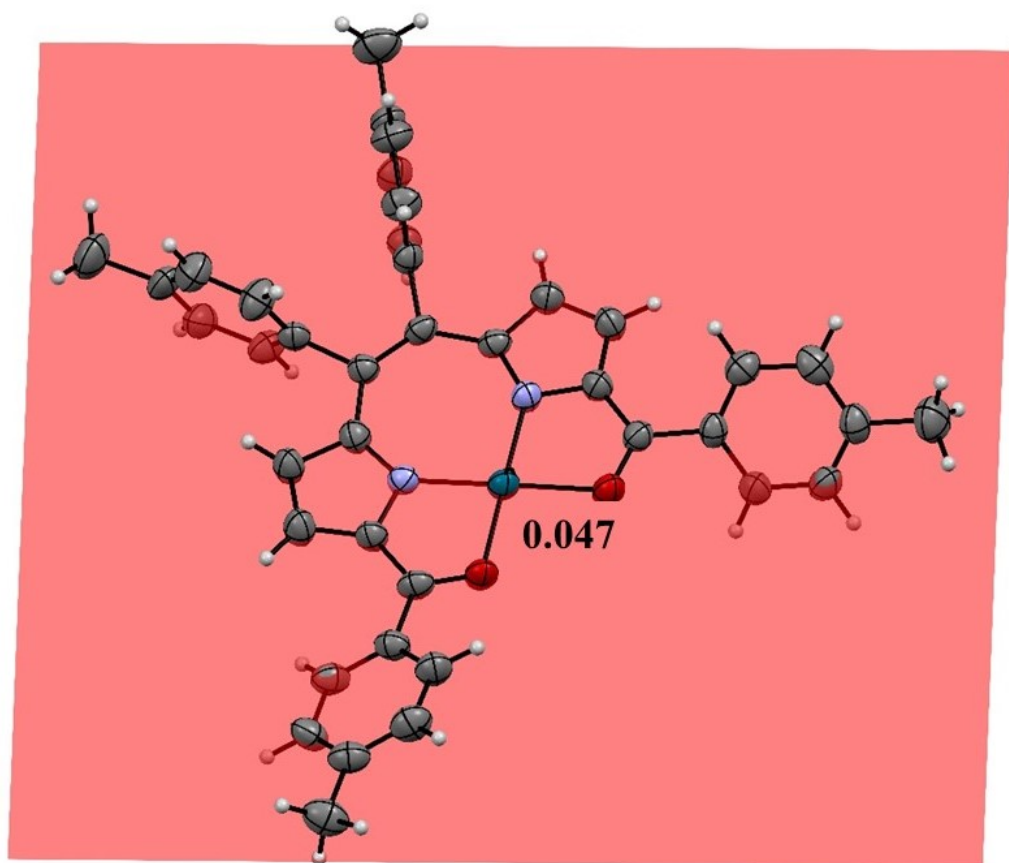

**Figure S12.** Deviation of Pd atom in **Pd-4** from mean plane constructed by 16 atoms (red plane).

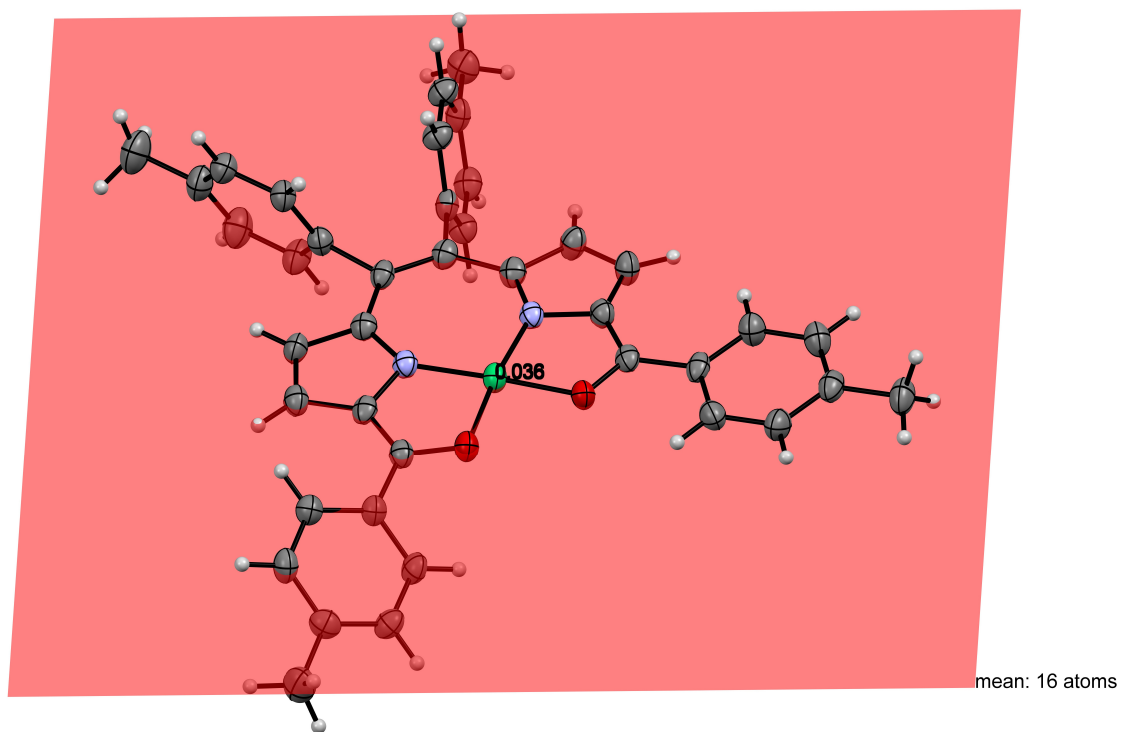

**Figure S13.** Deviation of Ni atom in Ni-4 from mean plane constructed by 16 atoms (red plane).

mean: 16 atoms

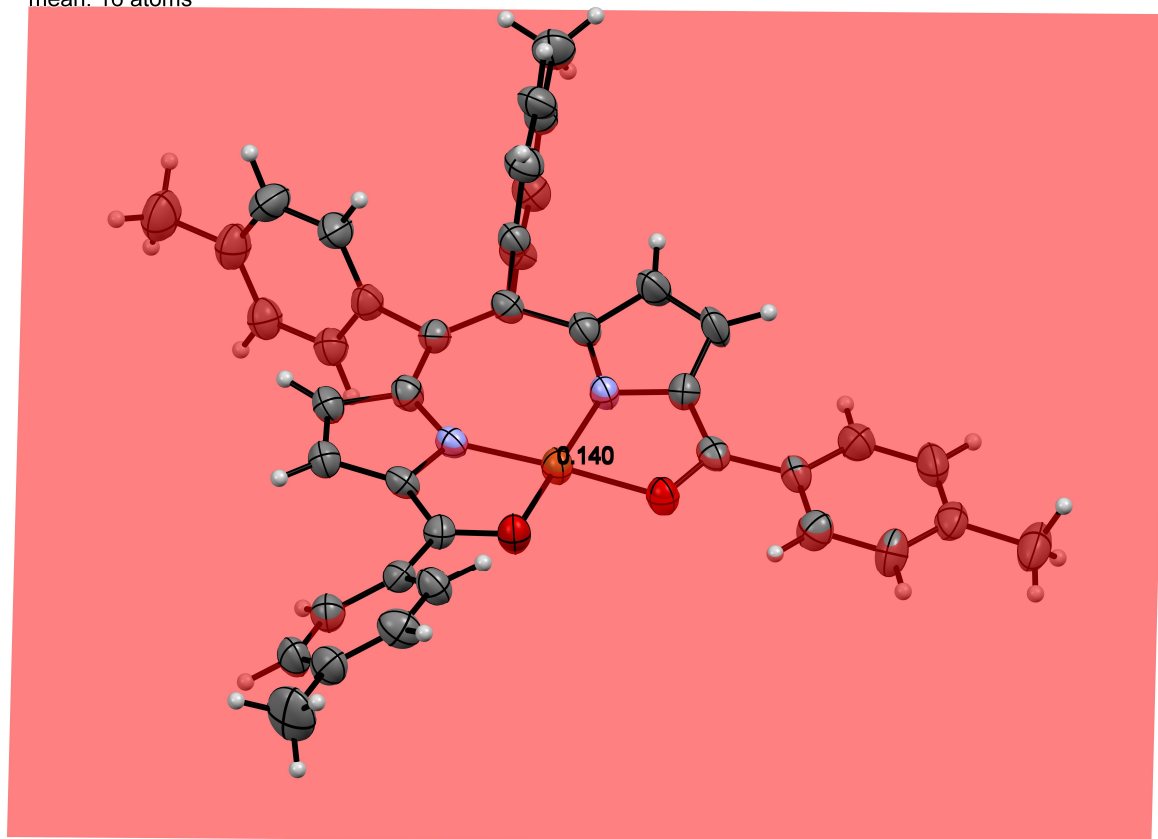

**Figure S14.** Deviation of Cu atom in **Cu-4** from mean plane constructed by 16 atoms (red plane).



**Table S2.** Bond Lengths for **Pd-4**.

| <b>Atom</b> | <b>Atom</b> | <b>Length/Å</b> | <b>Atom</b> | <b>Atom</b> | <b>Length/Å</b> |
|-------------|-------------|-----------------|-------------|-------------|-----------------|
| Pd01        | O2          | 2.031(3)        | C34         | C39         | 1.404(7)        |
| Pd01        | O1          | 2.045(3)        | C25         | C24         | 1.383(7)        |
| Pd01        | N1          | 1.950(4)        | C27         | C32         | 1.384(7)        |
| Pd01        | N2          | 1.955(4)        | C27         | C28         | 1.363(7)        |
| O2          | C12         | 1.288(6)        | C8          | C9          | 1.434(7)        |
| O1          | C1          | 1.276(6)        | C13         | C14         | 1.394(7)        |
| N1          | C5          | 1.348(6)        | C13         | C18         | 1.388(7)        |
| N1          | C2          | 1.386(6)        | C37         | C36         | 1.390(7)        |
| N2          | C11         | 1.378(6)        | C37         | C38         | 1.388(8)        |
| N2          | C8          | 1.336(6)        | C37         | C40         | 1.502(7)        |
| C20         | C6          | 1.510(6)        | C23         | C24         | 1.386(8)        |
| C20         | C25         | 1.395(7)        | C23         | C22         | 1.384(8)        |
| C20         | C21         | 1.386(7)        | C23         | C26         | 1.519(7)        |
| C5          | C4          | 1.431(6)        | C32         | C31         | 1.406(7)        |
| C5          | C6          | 1.455(6)        | C21         | C22         | 1.383(7)        |
| C3          | C4          | 1.362(7)        | C39         | C38         | 1.395(7)        |
| C3          | C2          | 1.407(7)        | C10         | C9          | 1.372(7)        |
| C1          | C2          | 1.410(7)        | C14         | C15         | 1.381(7)        |
| C1          | C13         | 1.482(6)        | C31         | C30         | 1.373(8)        |
| C11         | C12         | 1.407(7)        | C17         | C16         | 1.387(8)        |
| C11         | C10         | 1.414(7)        | C17         | C18         | 1.418(7)        |
| C6          | C7          | 1.382(6)        | C30         | C29         | 1.384(8)        |

|     |     |          |     |     |          |
|-----|-----|----------|-----|-----|----------|
| C35 | C34 | 1.386(7) | C30 | C33 | 1.529(7) |
| C35 | C36 | 1.386(7) | C16 | C15 | 1.362(8) |
| C7  | C27 | 1.515(6) | C16 | C19 | 1.523(8) |
| C7  | C8  | 1.459(7) | C28 | C29 | 1.383(8) |
| C34 | C12 | 1.473(6) |     |     |          |

---

**Table S3.** Bond angles for **Pd-4**.

| Atom | Atom | Atom | Angle/°     | Atom | Atom | Atom | Angle/°   |
|------|------|------|-------------|------|------|------|-----------|
| O2   | Pd01 | O1   | 96.45 (13)  | C3   | C2   | C1   | 135.8 (5) |
| N1   | Pd01 | O2   | 177.55 (14) | C32  | C27  | C7   | 118.4 (5) |
| N1   | Pd01 | O1   | 82.50 (14)  | C28  | C27  | C7   | 122.6 (4) |
| N1   | Pd01 | N2   | 98.65 (16)  | C28  | C27  | C32  | 119.0 (5) |
| N2   | Pd01 | O2   | 82.37 (15)  | N2   | C8   | C7   | 129.5 (4) |
| N2   | Pd01 | O1   | 178.48 (13) | N2   | C8   | C9   | 107.6 (4) |
| C12  | O2   | Pd01 | 111.9 (3)   | C9   | C8   | C7   | 122.9 (5) |
| C1   | O1   | Pd01 | 110.9 (3)   | C14  | C13  | C1   | 119.7 (4) |
| C5   | N1   | Pd01 | 139.5 (3)   | C18  | C13  | C1   | 120.7 (5) |
| C5   | N1   | C2   | 108.8 (4)   | C18  | C13  | C14  | 119.6 (4) |
| C2   | N1   | Pd01 | 111.7 (3)   | O2   | C12  | C11  | 117.6 (4) |
| C11  | N2   | Pd01 | 111.4 (3)   | O2   | C12  | C34  | 117.4 (4) |
| C8   | N2   | Pd01 | 138.5 (3)   | C11  | C12  | C34  | 124.9 (5) |
| C8   | N2   | C11  | 109.9 (4)   | C36  | C37  | C40  | 120.8 (5) |
| C25  | C20  | C6   | 122.6 (5)   | C38  | C37  | C36  | 117.7 (5) |
| C21  | C20  | C6   | 119.6 (4)   | C38  | C37  | C40  | 121.6 (5) |
| C21  | C20  | C25  | 117.7 (5)   | C24  | C23  | C26  | 122.4 (5) |
| N1   | C5   | C4   | 107.3 (4)   | C22  | C23  | C24  | 117.5 (5) |
| N1   | C5   | C6   | 128.3 (4)   | C22  | C23  | C26  | 120.1 (5) |
| C4   | C5   | C6   | 124.3 (4)   | C27  | C32  | C31  | 119.5 (5) |
| C4   | C3   | C2   | 106.6 (4)   | C25  | C24  | C23  | 121.6 (5) |
| O1   | C1   | C2   | 119.1 (4)   | C35  | C36  | C37  | 121.4 (5) |
| O1   | C1   | C13  | 117.0 (4)   | C22  | C21  | C20  | 121.1 (5) |
| C2   | C1   | C13  | 123.9 (4)   | C38  | C39  | C34  | 119.9 (5) |

|     |     |     |           |     |     |     |           |
|-----|-----|-----|-----------|-----|-----|-----|-----------|
| C3  | C4  | C5  | 108.7 (4) | C37 | C38 | C39 | 121.7 (5) |
| N2  | C11 | C12 | 116.7 (4) | C9  | C10 | C11 | 107.0 (5) |
| N2  | C11 | C10 | 107.8 (4) | C15 | C14 | C13 | 119.8 (5) |
| C12 | C11 | C10 | 135.5 (5) | C10 | C9  | C8  | 107.7 (5) |
| C5  | C6  | C20 | 110.8 (4) | C30 | C31 | C32 | 120.9 (5) |
| C7  | C6  | C20 | 116.6 (4) | C16 | C17 | C18 | 120.3 (5) |
| C7  | C6  | C5  | 132.5 (4) | C31 | C30 | C29 | 118.7 (5) |
| C34 | C35 | C36 | 121.0 (5) | C31 | C30 | C33 | 120.3 (6) |
| C6  | C7  | C27 | 115.9 (4) | C29 | C30 | C33 | 121.0 (6) |
| C6  | C7  | C8  | 132.6 (4) | C21 | C22 | C23 | 121.4 (5) |
| C8  | C7  | C27 | 111.5 (4) | C17 | C16 | C19 | 119.3 (5) |
| C35 | C34 | C12 | 122.9 (5) | C15 | C16 | C17 | 119.1 (5) |
| C35 | C34 | C39 | 118.4 (4) | C15 | C16 | C19 | 121.6 (6) |
| C39 | C34 | C12 | 118.7 (5) | C13 | C18 | C17 | 119.2 (5) |
| C24 | C25 | C20 | 120.7 (5) | C16 | C15 | C14 | 122.0 (5) |
| N1  | C2  | C3  | 108.6 (4) | C27 | C28 | C29 | 121.7 (5) |
| N1  | C2  | C1  | 115.6 (4) | C28 | C29 | C30 | 120.1 (6) |

---

**Table S4. Bond Lengths for Ni-4.**

| <b>Atom</b> | <b>Atom</b> | <b>Length/Å</b> | <b>Atom</b> | <b>Atom</b> | <b>Length/Å</b> |
|-------------|-------------|-----------------|-------------|-------------|-----------------|
| Ni1         | O1          | 1.854 (2)       | C16         | C17         | 1.383 (5)       |
| Ni1         | O2          | 1.861 (2)       | C16         | C19         | 1.505 (5)       |
| Ni1         | N1          | 1.822 (3)       | C17         | C18         | 1.383 (5)       |
| Ni1         | N2          | 1.833 (3)       | C20         | C6          | 1.505 (5)       |
| O1          | C1          | 1.280 (4)       | C20         | C21         | 1.393 (4)       |
| O2          | C12         | 1.296 (4)       | C20         | C25         | 1.395 (5)       |
| N1          | C2          | 1.400 (4)       | C21         | C22         | 1.391 (5)       |
| N1          | C5          | 1.372 (4)       | C22         | C23         | 1.380 (5)       |
| N2          | C8          | 1.354 (4)       | C23         | C24         | 1.394 (5)       |
| N2          | C11         | 1.395 (4)       | C23         | C26         | 1.501 (5)       |
| C1          | C13         | 1.477 (4)       | C25         | C24         | 1.382 (5)       |
| C2          | C1          | 1.409 (5)       | C27         | C28         | 1.379 (5)       |
| C2          | C3          | 1.408 (5)       | C27         | C32         | 1.394 (4)       |
| C4          | C3          | 1.357 (5)       | C28         | C29         | 1.394 (5)       |
| C5          | C4          | 1.430 (5)       | C29         | C30         | 1.394 (5)       |
| C5          | C6          | 1.457 (5)       | C30         | C33         | 1.506 (5)       |
| C7          | C6          | 1.378 (5)       | C31         | C30         | 1.377 (5)       |
| C7          | C27         | 1.514 (4)       | C32         | C31         | 1.391 (4)       |
| C8          | C7          | 1.451 (5)       | C34         | C12         | 1.471 (5)       |
| C8          | C9          | 1.427 (5)       | C34         | C35         | 1.399 (5)       |
| C9          | C10         | 1.367 (5)       | C35         | C36         | 1.386 (5)       |
| C10         | C11         | 1.419 (5)       | C36         | C37         | 1.395 (5)       |
| C12         | C11         | 1.393 (5)       | C37         | C40         | 1.501 (5)       |

|     |     |           |     |     |           |
|-----|-----|-----------|-----|-----|-----------|
| C13 | C14 | 1.391 (5) | C38 | C37 | 1.385 (5) |
| C13 | C18 | 1.397 (5) | C39 | C34 | 1.398 (4) |
| C14 | C15 | 1.384 (5) | C39 | C38 | 1.382 (5) |
| C16 | C15 | 1.393 (5) |     |     |           |

---

**Table S5.** Bond angles for Ni-4.

| Atom | Atom | Atom | Angle/°     | Atom | Atom | Atom | Angle/°   |
|------|------|------|-------------|------|------|------|-----------|
| O1   | Ni1  | O2   | 88.61 (10)  | C11  | C12  | C34  | 126.4 (3) |
| N1   | Ni1  | O1   | 85.74 (11)  | C14  | C13  | C1   | 119.0 (3) |
| N1   | Ni1  | O2   | 173.56 (10) | C14  | C13  | C18  | 117.1 (3) |
| N1   | Ni1  | N2   | 99.25 (12)  | C18  | C13  | C1   | 123.9 (3) |
| N2   | Ni1  | O1   | 174.68 (11) | C15  | C14  | C13  | 121.5 (4) |
| N2   | Ni1  | O2   | 86.51 (11)  | C14  | C15  | C16  | 121.2 (4) |
| C1   | O1   | Ni1  | 114.1 (2)   | C15  | C16  | C19  | 121.3 (4) |
| C12  | O2   | Ni1  | 112.5 (2)   | C17  | C16  | C15  | 117.4 (3) |
| C2   | N1   | Ni1  | 112.1 (2)   | C17  | C16  | C19  | 121.3 (4) |
| C5   | N1   | Ni1  | 140.2 (2)   | C18  | C17  | C16  | 121.6 (4) |
| C5   | N1   | C2   | 107.4 (3)   | C17  | C18  | C13  | 121.2 (4) |
| C8   | N2   | Ni1  | 141.5 (2)   | C21  | C20  | C6   | 120.4 (3) |
| C8   | N2   | C11  | 107.4 (3)   | C21  | C20  | C25  | 117.2 (3) |
| C11  | N2   | Ni1  | 111.0 (2)   | C25  | C20  | C6   | 122.3 (3) |
| O1   | C1   | C2   | 115.7 (3)   | C22  | C21  | C20  | 121.7 (3) |
| O1   | C1   | C13  | 116.4 (3)   | C23  | C22  | C21  | 120.9 (3) |
| C2   | C1   | C13  | 127.9 (3)   | C22  | C23  | C24  | 117.5 (3) |
| N1   | C2   | C1   | 112.3 (3)   | C22  | C23  | C26  | 121.6 (3) |
| N1   | C2   | C3   | 108.9 (3)   | C24  | C23  | C26  | 120.9 (3) |
| C3   | C2   | C1   | 138.7 (3)   | C25  | C24  | C23  | 122.0 (3) |
| C4   | C3   | C2   | 107.2 (3)   | C24  | C25  | C20  | 120.6 (3) |
| C3   | C4   | C5   | 108.8 (3)   | C28  | C27  | C7   | 121.9 (3) |
| N1   | C5   | C4   | 107.7 (3)   | C28  | C27  | C32  | 118.6 (3) |
| N1   | C5   | C6   | 128.2 (3)   | C32  | C27  | C7   | 119.3 (3) |

|     |     |     |           |     |     |     |           |
|-----|-----|-----|-----------|-----|-----|-----|-----------|
| C4  | C5  | C6  | 124.0 (3) | C27 | C28 | C29 | 120.8 (3) |
| C5  | C6  | C20 | 111.0 (3) | C30 | C29 | C28 | 121.0 (3) |
| C7  | C6  | C5  | 131.1 (3) | C29 | C30 | C33 | 120.5 (4) |
| C7  | C6  | C20 | 117.9 (3) | C31 | C30 | C29 | 117.5 (3) |
| C6  | C7  | C8  | 130.9 (3) | C31 | C30 | C33 | 122.0 (3) |
| C6  | C7  | C27 | 118.0 (3) | C30 | C31 | C32 | 122.2 (3) |
| C8  | C7  | C27 | 111.0 (3) | C31 | C32 | C27 | 119.8 (3) |
| N2  | C8  | C7  | 127.9 (3) | C35 | C34 | C12 | 123.0 (3) |
| N2  | C8  | C9  | 108.4 (3) | C39 | C34 | C12 | 118.5 (3) |
| C9  | C8  | C7  | 123.5 (3) | C39 | C34 | C35 | 118.5 (3) |
| C10 | C9  | C8  | 108.9 (3) | C36 | C35 | C34 | 120.5 (3) |
| C9  | C10 | C11 | 105.8 (3) | C35 | C36 | C37 | 120.8 (3) |
| N2  | C11 | C10 | 109.5 (3) | C36 | C37 | C40 | 121.2 (3) |
| C12 | C11 | N2  | 113.5 (3) | C38 | C37 | C36 | 118.3 (3) |
| C12 | C11 | C10 | 136.9 (3) | C38 | C37 | C40 | 120.5 (3) |
| O2  | C12 | C11 | 116.5 (3) | C39 | C38 | C37 | 121.6 (3) |
| O2  | C12 | C34 | 117.0 (3) | C38 | C39 | C34 | 120.2 (3) |

---



**Table S6.** Bond lengths for **Cu-4**.

| <b>Atom</b> | <b>Atom</b> | <b>Length/Å</b> | <b>Atom</b> | <b>Atom</b> | <b>Length/Å</b> |
|-------------|-------------|-----------------|-------------|-------------|-----------------|
| Cu1         | O1          | 1.941 (4)       | C14         | C15         | 1.521 (8)       |
| Cu1         | O2          | 1.955 (4)       | C14         | C16         | 1.388 (8)       |
| Cu1         | N1          | 1.894 (4)       | C16         | C17         | 1.395 (8)       |
| Cu1         | N2          | 1.887 (5)       | C18         | C19         | 1.421 (8)       |
| O1          | C22         | 1.285 (6)       | C19         | C20         | 1.376 (8)       |
| O2          | C33         | 1.285 (6)       | C20         | C21         | 1.394 (8)       |
| N1          | C1          | 1.364 (7)       | C21         | C22         | 1.431 (8)       |
| N1          | C32         | 1.378 (7)       | C22         | C23         | 1.479 (8)       |
| N2          | C18         | 1.359 (7)       | C23         | C24         | 1.393 (8)       |
| N2          | C21         | 1.383 (7)       | C23         | C28         | 1.396 (8)       |
| C1          | C2          | 1.456 (8)       | C24         | C25         | 1.381 (8)       |
| C1          | C30         | 1.424 (8)       | C25         | C26         | 1.399 (9)       |
| C2          | C3          | 1.509 (7)       | C26         | C27         | 1.366 (9)       |
| C2          | C10         | 1.377 (7)       | C26         | C29         | 1.509 (8)       |
| C3          | C4          | 1.388 (8)       | C27         | C28         | 1.387 (8)       |
| C3          | C9          | 1.388 (8)       | C30         | C31         | 1.369 (8)       |
| C4          | C5          | 1.391 (8)       | C31         | C32         | 1.420 (7)       |
| C5          | C6          | 1.390 (9)       | C32         | C33         | 1.420 (8)       |
| C6          | C7          | 1.522 (8)       | C33         | C34         | 1.466 (8)       |
| C6          | C8          | 1.389 (9)       | C34         | C35         | 1.392 (8)       |
| C8          | C9          | 1.396 (7)       | C34         | C40         | 1.399 (8)       |
| C10         | C11         | 1.523 (8)       | C35         | C36         | 1.372 (8)       |
| C10         | C18         | 1.473 (7)       | C36         | C37         | 1.383 (8)       |

|     |     |          |     |     |          |
|-----|-----|----------|-----|-----|----------|
| C11 | C12 | 1.389(8) | C37 | C38 | 1.508(9) |
| C11 | C17 | 1.382(8) | C37 | C39 | 1.388(9) |
| C12 | C13 | 1.403(8) | C39 | C40 | 1.389(8) |
| C13 | C14 | 1.389(9) |     |     |          |

---

**Table S7.** Bond angles for **Cu-4**.

| Atom | Atom | Atom | Angle/°     | Atom | Atom | Atom | Angle/°   |
|------|------|------|-------------|------|------|------|-----------|
| O2   | Cu1  | O1   | 92.00 (16)  | C17  | C16  | C14  | 122.4 (6) |
| N1   | Cu1  | O1   | 176.77 (18) | C16  | C17  | C11  | 120.2 (6) |
| N1   | Cu1  | O2   | 85.08 (17)  | C10  | C18  | N2   | 128.1 (5) |
| N2   | Cu1  | O1   | 84.71 (17)  | C19  | C18  | N2   | 108.7 (5) |
| N2   | Cu1  | O2   | 172.09 (17) | C19  | C18  | C10  | 123.1 (5) |
| N2   | Cu1  | N1   | 98.36 (19)  | C20  | C19  | C18  | 107.4 (5) |
| C22  | O1   | Cu1  | 112.2 (4)   | C21  | C20  | C19  | 107.0 (5) |
| C33  | O2   | Cu1  | 111.5 (4)   | C20  | C21  | N2   | 109.5 (5) |
| C1   | N1   | Cu1  | 141.3 (4)   | C22  | C21  | N2   | 113.7 (5) |
| C32  | N1   | Cu1  | 110.7 (4)   | C22  | C21  | C20  | 136.7 (5) |
| C32  | N1   | C1   | 107.6 (5)   | C21  | C22  | O1   | 117.0 (5) |
| C18  | N2   | Cu1  | 139.3 (4)   | C23  | C22  | O1   | 116.9 (5) |
| C21  | N2   | Cu1  | 111.6 (4)   | C23  | C22  | C21  | 126.1 (5) |
| C21  | N2   | C18  | 107.4 (5)   | C24  | C23  | C22  | 123.5 (5) |
| C2   | C1   | N1   | 127.2 (5)   | C28  | C23  | C22  | 118.8 (5) |
| C30  | C1   | N1   | 107.9 (5)   | C28  | C23  | C24  | 117.6 (5) |
| C30  | C1   | C2   | 124.9 (5)   | C25  | C24  | C23  | 121.2 (6) |
| C3   | C2   | C1   | 110.6 (5)   | C26  | C25  | C24  | 120.9 (6) |
| C10  | C2   | C1   | 131.9 (5)   | C27  | C26  | C25  | 117.7 (6) |
| C10  | C2   | C3   | 117.4 (5)   | C29  | C26  | C25  | 120.5 (6) |
| C4   | C3   | C2   | 121.7 (5)   | C29  | C26  | C27  | 121.7 (6) |
| C9   | C3   | C2   | 119.5 (5)   | C28  | C27  | C26  | 122.1 (6) |
| C9   | C3   | C4   | 118.6 (5)   | C27  | C28  | C23  | 120.4 (6) |
| C5   | C4   | C3   | 121.0 (6)   | C31  | C30  | C1   | 109.1 (5) |

|     |     |     |           |     |     |     |           |
|-----|-----|-----|-----------|-----|-----|-----|-----------|
| C6  | C5  | C4  | 121.0 (6) | C32 | C31 | C30 | 105.4 (5) |
| C7  | C6  | C5  | 120.6 (6) | C31 | C32 | N1  | 109.9 (5) |
| C8  | C6  | C5  | 117.6 (6) | C33 | C32 | N1  | 115.5 (5) |
| C8  | C6  | C7  | 121.8 (6) | C33 | C32 | C31 | 134.4 (5) |
| C9  | C8  | C6  | 121.8 (6) | C32 | C33 | O2  | 117.3 (5) |
| C8  | C9  | C3  | 120.1 (6) | C34 | C33 | O2  | 117.6 (5) |
| C11 | C10 | C2  | 118.1 (5) | C34 | C33 | C32 | 125.0 (5) |
| C18 | C10 | C2  | 131.4 (5) | C35 | C34 | C33 | 119.3 (5) |
| C18 | C10 | C11 | 110.4 (5) | C40 | C34 | C33 | 122.5 (5) |
| C12 | C11 | C10 | 120.3 (5) | C40 | C34 | C35 | 118.1 (5) |
| C17 | C11 | C10 | 121.0 (5) | C36 | C35 | C34 | 121.7 (5) |
| C17 | C11 | C12 | 118.4 (6) | C37 | C36 | C35 | 120.8 (6) |
| C13 | C12 | C11 | 120.9 (6) | C38 | C37 | C36 | 120.7 (6) |
| C14 | C13 | C12 | 121.1 (6) | C39 | C37 | C36 | 118.1 (6) |
| C15 | C14 | C13 | 121.6 (6) | C39 | C37 | C38 | 121.2 (6) |
| C16 | C14 | C13 | 117.0 (6) | C40 | C39 | C37 | 121.8 (6) |
| C16 | C14 | C15 | 121.4 (6) | C39 | C40 | C34 | 119.5 (6) |

---

**Table S8.** Electrochemical data of **Pd-4**, **Ni-4**, **Cu-4** and **4** in CH<sub>2</sub>Cl<sub>2</sub>

| <b>Compounds</b> | <b>Oxidation (V)</b> |             | <b>Reduction (V)</b> |
|------------------|----------------------|-------------|----------------------|
| <b>Pd-4</b>      | <b>0.75</b>          | <b>1.02</b> | <b>-1.63</b>         |
| <b>Ni-4</b>      | <b>0.92</b>          | <b>-</b>    | <b>-1.52</b>         |
| <b>Cu-4</b>      | <b>0.88</b>          | <b>-</b>    | <b>--</b>            |
| <b>4</b>         | <b>0.96</b>          | <b>1.30</b> | <b>-1.75</b>         |

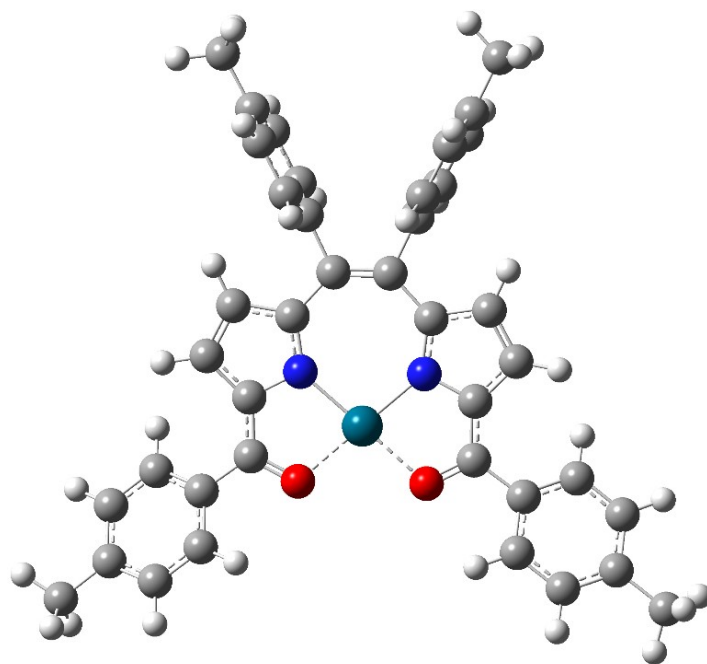

**Figure S15.** DFT Optimized structure of **Pd-4**.

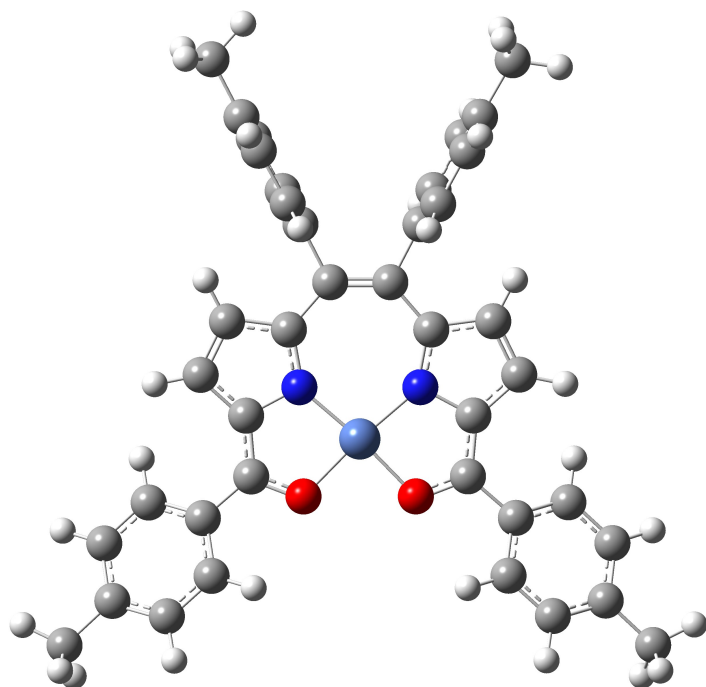

**Figure S16.** DFT Optimized structure of Ni-4.

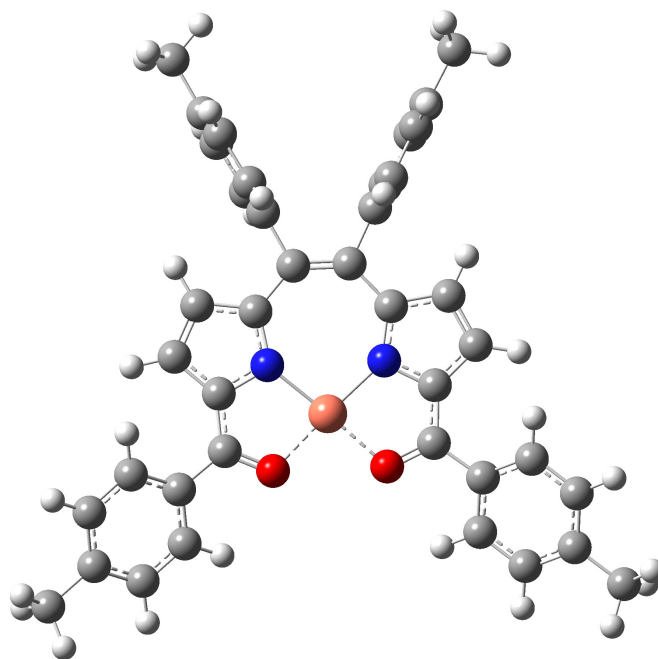

**Figure S17.** DFT Optimized structure of **Cu-4**.



**Table S9.** S0 optimized geometry of the compound **Pd-4** at B3LYP/6-31g (d,p)/LANL2DZ level of theory

# Sum of imaginary frequencies= 0

# Total Energy (hartree) = -1930.318440

| Atom | X        | Y        | Z        | Atom | X        | Y        | Z        |
|------|----------|----------|----------|------|----------|----------|----------|
| O    | 2.857829 | -1.55726 | -0.01948 | H    | 0.045776 | -4.81097 | -0.18647 |
| O    | 2.856272 | 1.560046 | -0.02467 | C    | 0.85893  | -2.73648 | -0.011   |
| N    | 0.223303 | 1.502194 | 0.011395 | C    | 2.276919 | -2.7026  | 0.009683 |
| N    | 0.224651 | -1.50176 | 0.010887 | C    | 3.139928 | -3.90193 | 0.038232 |
| C    | -1.12003 | 1.683808 | -0.04865 | C    | 2.75297  | -5.09515 | 0.668873 |
| C    | -2.1886  | 0.686328 | -0.0389  | H    | 1.799608 | -5.14969 | 1.182319 |
| C    | -3.55179 | 1.342035 | -0.0262  | C    | 3.609833 | -6.1929  | 0.686194 |
| C    | -4.21422 | 1.655855 | -1.21989 | H    | 3.299247 | -7.10342 | 1.192292 |
| H    | -3.75575 | 1.393029 | -2.16904 | C    | 4.870754 | -6.13962 | 0.076857 |
| C    | -5.45204 | 2.297329 | -1.20366 | C    | 5.25842  | -4.93744 | -0.53504 |
| H    | -5.94829 | 2.523052 | -2.14485 | H    | 6.237728 | -4.86806 | -1.00213 |
| C    | -6.06791 | 2.654744 | 0.003511 | C    | 4.414735 | -3.83301 | -0.54924 |
| C    | -7.39684 | 3.373509 | 0.01524  | H    | 4.725567 | -2.90388 | -1.01451 |
| H    | -7.91076 | 3.248865 | 0.972941 | C    | 5.781361 | -7.34328 | 0.065876 |
| H    | -8.05907 | 3.003937 | -0.7743  | H    | 5.663221 | -7.91681 | -0.86223 |
| H    | -7.2693  | 4.451076 | -0.14906 | H    | 5.561883 | -8.01951 | 0.897065 |
| C    | -5.39907 | 2.345828 | 1.19436  | H    | 6.833531 | -7.05007 | 0.132655 |
| H    | -5.85331 | 2.609552 | 2.146639 | C    | -1.35259 | 3.10387  | -0.12642 |
| C    | -4.15934 | 1.705676 | 1.181225 | H    | -2.32123 | 3.570474 | -0.19433 |
| H    | -3.6583  | 1.48207  | 2.118912 | C    | -0.13216 | 3.747577 | -0.11453 |
| C    | -2.18791 | -0.68858 | -0.04037 | H    | 0.040692 | 4.810703 | -0.19465 |
| C    | -3.55066 | -1.3452  | -0.03088 | C    | 0.85628  | 2.737575 | -0.01408 |
| C    | -4.20068 | -1.67662 | -1.22608 | C    | 2.274422 | 2.705046 | 0.004124 |
| H    | -3.73179 | -1.42958 | -2.17443 | C    | 3.137201 | 3.904644 | 0.030347 |
| C    | -5.43519 | -2.32562 | -1.21298 | C    | 4.409593 | 3.836392 | -0.56263 |
| H    | -5.91859 | -2.57187 | -2.15563 | H    | 4.717454 | 2.908728 | -1.03275 |
| C    | -6.06121 | -2.66854 | -0.00743 | C    | 5.250926 | 4.942577 | -0.55575 |
| C    | -7.4142  | -3.34049 | 0.00531  | H    | 6.225274 | 4.876234 | -1.03355 |
| H    | -7.54053 | -3.97084 | 0.890917 | C    | 4.865438 | 6.144418 | 0.058328 |
| H    | -7.55901 | -3.9673  | -0.88005 | C    | 5.798734 | 7.330266 | 0.091653 |
| H    | -8.22485 | -2.60076 | 0.015069 | H    | 6.51595  | 7.243354 | 0.917628 |
| C    | -5.401   | -2.34794 | 1.185826 | H    | 5.252327 | 8.267445 | 0.230859 |
| H    | -5.85759 | -2.61154 | 2.137083 | H    | 6.379442 | 7.407916 | -0.83271 |

|   |          |          |          |    |          |          |          |
|---|----------|----------|----------|----|----------|----------|----------|
| C | -4.16553 | -1.70071 | 1.175798 | C  | 3.604423 | 6.199387 | 0.666958 |
| H | -3.66919 | -1.47184 | 2.114701 | H  | 3.290559 | 7.113871 | 1.163864 |
| C | -1.1184  | -1.68496 | -0.04945 | C  | 2.749748 | 5.099713 | 0.656963 |
| C | -1.34941 | -3.10548 | -0.12383 | H  | 1.794685 | 5.156958 | 1.166909 |
| H | -2.31751 | -3.57342 | -0.19058 | Pd | 1.503967 | 0.000729 | -0.00313 |
| C | -0.12832 | -3.7478  | -0.10958 |    |          |          |          |

**Table S10.** S0 optimized geometry of the compound **Ni-4** at B3LYP/6-31g (d,p) level of theory

# Sum of imaginary frequencies= 0

# Total Energy (hartree) = -3311.206304

| <b>Atom</b> | <b>X</b>  | <b>Y</b>  | <b>Z</b>  |
|-------------|-----------|-----------|-----------|
| <b>Ni</b>   | 1.423336  | 0.00076   | 0.072213  |
| <b>O</b>    | 2.752649  | -1.290301 | 0.11464   |
| <b>O</b>    | 2.749808  | 1.294829  | 0.113391  |
| <b>N</b>    | 0.236     | -1.392755 | -0.011544 |
| <b>N</b>    | 0.232947  | 1.39159   | -0.01199  |
| <b>C</b>    | -1.104482 | 1.636426  | -0.002777 |
| <b>C</b>    | 0.895581  | -2.615521 | -0.015583 |
| <b>C</b>    | 4.532571  | 3.422039  | 0.551254  |
| <b>H</b>    | 4.760631  | 2.46904   | 1.015556  |
| <b>C</b>    | 2.301979  | -2.492619 | 0.017433  |
| <b>C</b>    | -3.544973 | -1.385589 | 0.00969   |
| <b>C</b>    | -1.297776 | 3.062065  | 0.002838  |
| <b>H</b>    | -2.255385 | 3.556988  | 0.018359  |
| <b>C</b>    | 3.263837  | 3.604893  | -0.026132 |
| <b>C</b>    | -2.202289 | 0.688235  | 0.004583  |
| <b>C</b>    | -1.100922 | -1.640476 | -0.001599 |
| <b>C</b>    | 2.977593  | 4.831516  | -0.644926 |
| <b>H</b>    | 2.025912  | 4.976047  | -1.143395 |
| <b>C</b>    | 3.271584  | -3.599543 | -0.020285 |
| <b>C</b>    | -1.291156 | -3.066493 | 0.010522  |
| <b>H</b>    | -2.247648 | -3.563497 | 0.029562  |
| <b>C</b>    | -4.176395 | -1.722665 | 1.213156  |
| <b>H</b>    | -3.702781 | -1.460897 | 2.154913  |
| <b>C</b>    | -3.547675 | 1.376933  | 0.013629  |
| <b>C</b>    | -2.200767 | -0.694652 | 0.003665  |
| <b>C</b>    | 2.296582  | 2.495941  | 0.013294  |
| <b>C</b>    | -0.059544 | 3.664946  | -0.001085 |
| <b>H</b>    | 0.148368  | 4.724131  | 0.03478   |
| <b>C</b>    | 0.889931  | 2.615754  | -0.020441 |
| <b>C</b>    | -5.39862  | -2.393635 | 1.216583  |
| <b>H</b>    | -5.867492 | -2.643283 | 2.165481  |
| <b>C</b>    | -4.193498 | 1.712214  | -1.182475 |
| <b>H</b>    | -3.732061 | 1.447685  | -2.129483 |
| <b>C</b>    | -4.167323 | -1.757782 | -1.188144 |

|   |           |           |           |
|---|-----------|-----------|-----------|
| H | -3.686317 | -1.523696 | -2.133525 |
| C | 5.469107  | 4.447335  | 0.534568  |
| H | 6.440126  | 4.291899  | 0.998153  |
| C | 5.197172  | -5.671616 | -0.063904 |
| C | 4.540624  | -3.41255  | 0.555138  |
| H | 4.767119  | -2.457994 | 1.017     |
| C | -0.051604 | -3.666684 | 0.008436  |
| H | 0.158683  | -4.725238 | 0.04895   |
| C | -6.030868 | -2.754485 | 0.020212  |
| C | 5.479465  | -4.435728 | 0.539478  |
| H | 6.450743  | -4.277051 | 1.001423  |
| C | 3.926644  | 5.850328  | -0.663595 |
| H | 3.689775  | 6.790563  | -1.154541 |
| C | 3.938667  | -5.844883 | -0.653604 |
| H | 3.70332   | -6.786721 | -1.142198 |
| C | 5.184783  | 5.681239  | -0.071859 |
| C | -5.420235 | 2.375187  | -1.172037 |
| H | -5.90406  | 2.616677  | -2.115522 |
| C | -5.38993  | -2.428277 | -1.181365 |
| H | -5.852041 | -2.704952 | -2.126062 |
| C | -4.161547 | 1.740362  | 1.218703  |
| H | -3.67443  | 1.498325  | 2.158915  |
| C | 2.987318  | -4.828178 | -0.635966 |
| H | 2.03533   | -4.975945 | -1.1329   |
| C | -7.371136 | -3.450983 | 0.025852  |
| H | -7.492658 | -4.079241 | 0.91354   |
| H | -7.497397 | -4.084599 | -0.857263 |
| H | -8.195257 | -2.726398 | 0.026115  |
| C | 6.234043  | -6.767533 | -0.097297 |
| H | 7.03533   | -6.531144 | -0.808069 |
| H | 5.797674  | -7.723806 | -0.397725 |
| H | 6.704112  | -6.901507 | 0.882567  |
| C | -5.388153 | 2.40325   | 1.225762  |
| H | -5.846587 | 2.666856  | 2.176     |
| C | -6.039948 | 2.734334  | 0.031214  |
| C | 6.219194  | 6.779441  | -0.1065   |
| H | 6.690735  | 6.913925  | 0.872564  |
| H | 5.780205  | 7.734911  | -0.405696 |
| H | 7.01969   | 6.545198  | -0.818887 |
| C | -7.353437 | 3.480301  | 0.040405  |
| H | -7.195259 | 4.566266  | 0.043099  |
| H | -7.945608 | 3.237908  | 0.928094  |
| H | -7.954846 | 3.243118  | -0.842334 |

**Table S11.** S0 optimized geometry of the compound **Cu-4** at B3LYP/6-31g (d,p) level of theory

# Sum of imaginary frequencies= 0

# Total Energy (hartree) = -3443.326896

| Atom | X         | Y         | Z         |
|------|-----------|-----------|-----------|
| Cu   | 1.504232  | 0.001291  | -0.116041 |
| O    | 2.856044  | -1.397079 | -0.149958 |
| O    | 2.851773  | 1.403871  | -0.150876 |
| N    | 0.25777   | 1.433575  | -0.011044 |
| N    | 0.262173  | -1.434856 | -0.012084 |
| C    | -1.078798 | 1.662081  | -0.045532 |
| C    | -2.164818 | 0.687627  | -0.032214 |
| C    | -3.51493  | 1.369324  | -0.016828 |
| C    | -4.174689 | 1.694034  | -1.208227 |
| H    | -3.723389 | 1.422907  | -2.158232 |
| C    | -5.402117 | 2.355644  | -1.189779 |
| H    | -5.896466 | 2.588974  | -2.129873 |
| C    | -6.009317 | 2.723421  | 0.017187  |
| C    | -7.324036 | 3.467107  | 0.034794  |
| H    | -7.909041 | 3.225615  | 0.927515  |
| H    | -7.931742 | 3.226804  | -0.842766 |
| H    | -7.167979 | 4.553398  | 0.033924  |
| C    | -5.343713 | 2.403126  | 1.207056  |
| H    | -5.792119 | 2.673629  | 2.160166  |
| C    | -4.11575  | 1.742975  | 1.191704  |
| H    | -3.617499 | 1.510083  | 2.128411  |
| C    | -2.16269  | -0.69653  | -0.03279  |
| C    | -3.511132 | -1.3815   | -0.018979 |
| C    | -4.1531   | -1.735827 | -1.211942 |
| H    | -3.687019 | -1.488735 | -2.16145  |
| C    | -5.375904 | -2.405664 | -1.195643 |
| H    | -5.852907 | -2.668508 | -2.136916 |
| C    | -5.9985   | -2.74835  | 0.011063  |
| C    | -7.339541 | -3.443208 | 0.027165  |
| H    | -7.455796 | -4.069602 | 0.916824  |
| H    | -7.472551 | -4.078457 | -0.853874 |
| H    | -8.162888 | -2.717727 | 0.031202  |
| C    | -5.346946 | -2.405486 | 1.202227  |
| H    | -5.801229 | -2.668098 | 2.154732  |
| C    | -4.123512 | -1.736687 | 1.18904   |

|   |           |           |           |
|---|-----------|-----------|-----------|
| H | -3.634327 | -1.489809 | 2.126899  |
| C | -1.073694 | -1.667661 | -0.044849 |
| C | -1.277488 | -3.089456 | -0.089005 |
| H | -2.235409 | -3.583142 | -0.130061 |
| C | -0.037927 | -3.697676 | -0.084261 |
| H | 0.164448  | -4.756813 | -0.147941 |
| C | 0.915567  | -2.652096 | -0.02721  |
| C | 2.335909  | -2.564188 | -0.043838 |
| C | 3.24455   | -3.725203 | 0.025997  |
| C | 2.901092  | -4.916097 | 0.685323  |
| H | 1.946709  | -4.995088 | 1.193081  |
| C | 3.80034   | -5.977493 | 0.738471  |
| H | 3.522174  | -6.885927 | 1.266339  |
| C | 5.063097  | -5.889835 | 0.137509  |
| C | 5.407648  | -4.689726 | -0.503221 |
| H | 6.38751   | -4.593359 | -0.964034 |
| C | 4.520868  | -3.621406 | -0.552705 |
| H | 4.797275  | -2.692263 | -1.038671 |
| C | 6.021319  | -7.055183 | 0.166032  |
| H | 5.944617  | -7.649367 | -0.753245 |
| H | 5.813299  | -7.724608 | 1.005386  |
| H | 7.059238  | -6.718273 | 0.246868  |
| C | -1.287001 | 3.083031  | -0.09516  |
| H | -2.246444 | 3.573417  | -0.139752 |
| C | -0.049377 | 3.695215  | -0.09109  |
| H | 0.149802  | 4.754737  | -0.158471 |
| C | 0.907304  | 2.652824  | -0.029613 |
| C | 2.327924  | 2.569434  | -0.046182 |
| C | 3.23268   | 3.733522  | 0.022454  |
| C | 4.509751  | 3.633192  | -0.555206 |
| H | 4.789607  | 2.704323  | -1.039722 |
| C | 5.392922  | 4.704525  | -0.506516 |
| H | 6.373436  | 4.610795  | -0.966489 |
| C | 5.043893  | 5.904363  | 0.132322  |
| C | 5.998305  | 7.072855  | 0.160058  |
| H | 7.037056  | 6.739508  | 0.245035  |
| H | 5.785676  | 7.744174  | 0.996736  |
| H | 5.922492  | 7.663922  | -0.761283 |
| C | 3.780401  | 5.988658  | 0.732194  |
| H | 3.498814  | 6.896907  | 1.258564  |
| C | 2.884757  | 4.924171  | 0.679872  |
| H | 1.929718  | 5.000623  | 1.186789  |

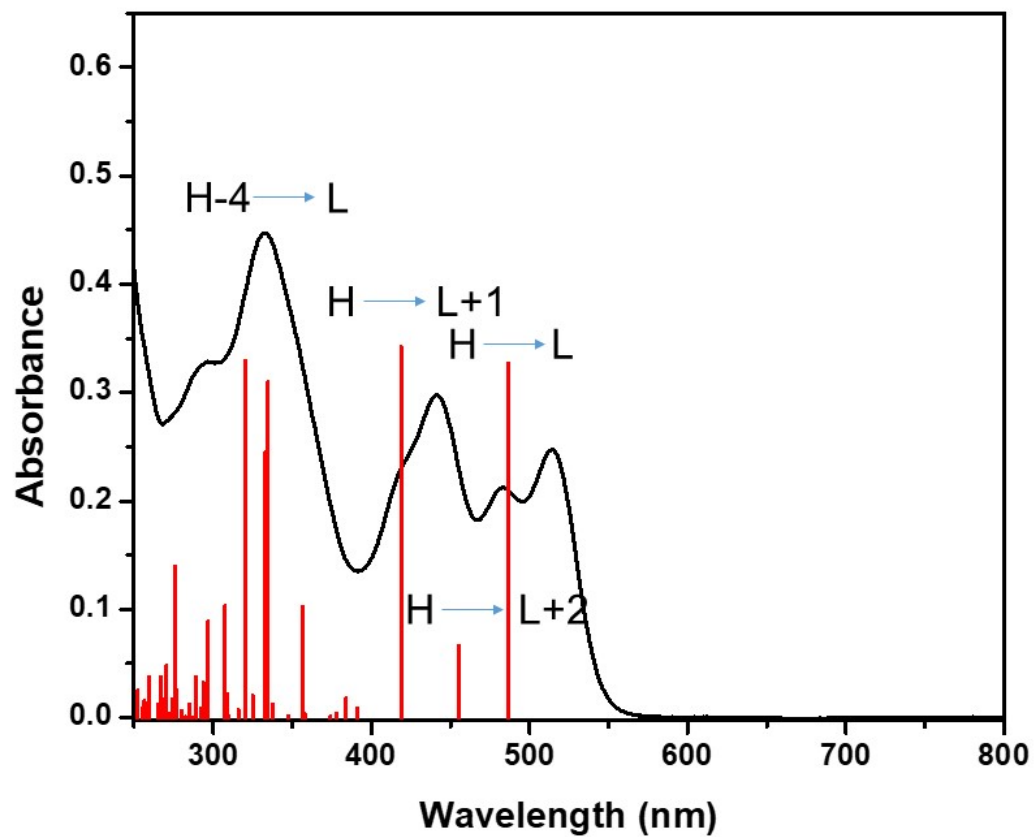

**Figure S18.** TD-DFT predicted electronic transitions (red sticks) and the normalized experimental UV-Vis absorption spectra (black line) of **Pd-4**.

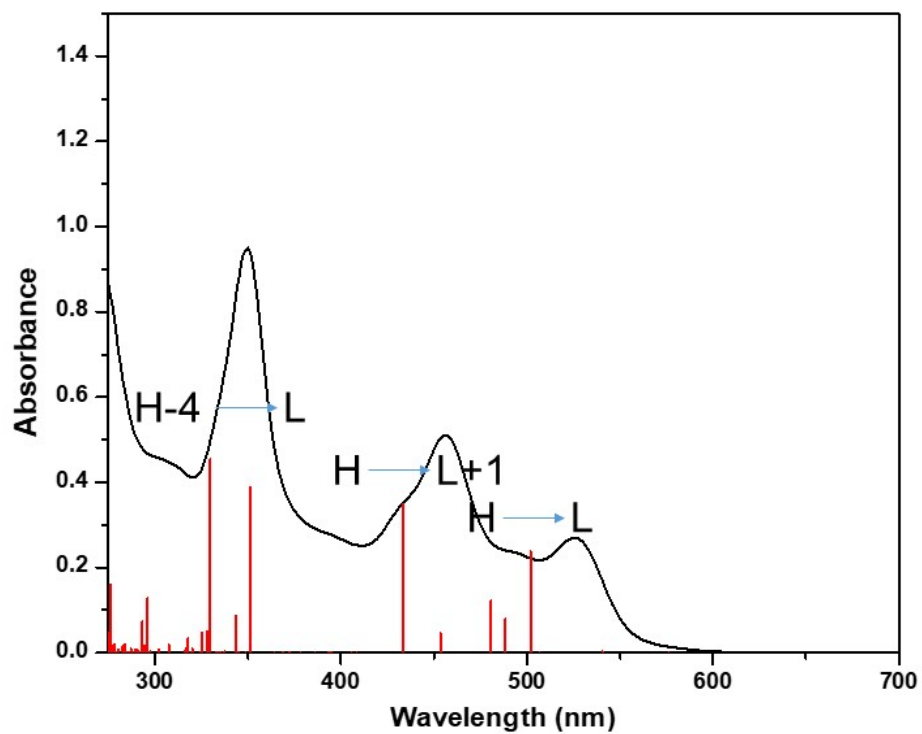

**Figure S19.** TD-DFT predicted electronic transitions (red sticks) and the experimental UV-Vis absorption spectra (black line) of Ni-4.



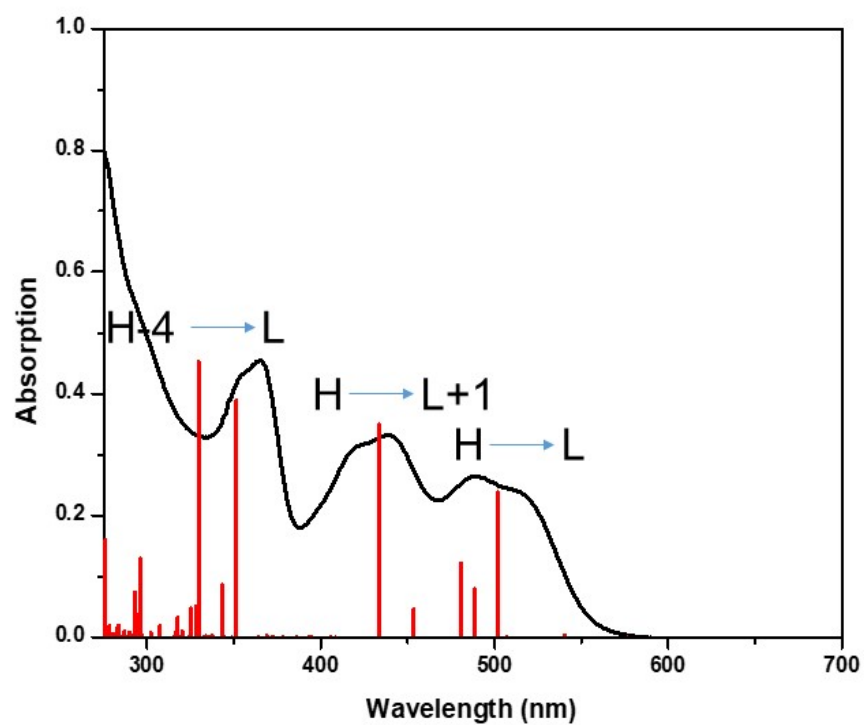

**Figure S20.** TD-DFT predicted electronic transitions (red sticks) and the normalized experimental UV-Vis absorption spectra (black line) of **Cu-4**.

**Table S12.** Major and minor transitions calculated using TD-DFT studies of **Pd-4**.

| Wavelength (nm) | Osc. Strength | Major contributions                                                | Minor contributions                                                            |
|-----------------|---------------|--------------------------------------------------------------------|--------------------------------------------------------------------------------|
| 486.4987        | 0.3273        | HOMO->LUMO (89%)                                                   | HOMO->L+2 (9%)                                                                 |
| 455.4893        | 0.0666        | HOMO->L+2 (90%)                                                    | HOMO->LUMO (8%)                                                                |
| 418.9504        | 0.3424        | HOMO->L+1 (93%)                                                    | H-4->LUMO (5%)                                                                 |
| 391.2284        | 0.0089        | H-7->L+2 (27%), H-3->LUMO (30%), H-3->L+2 (32%)                    | H-7->LUMO (2%)                                                                 |
| 383.852         | 0.018         | H-7->L+2 (31%), H-3->L+2 (48%)                                     | H-17->L+2 (2%), H-14->L+2 (3%), H-10->L+2 (5%), H-7->LUMO (5%), H-3->LUMO (2%) |
| 377.9775        | 0.0038        | H-1->LUMO (96%)                                                    |                                                                                |
| 374.1789        | 0.0012        | H-4->L+2 (26%), H-2->LUMO (17%), H-2->L+2 (43%)                    | H-16->L+2 (4%), H-15->L+2 (3%), H-4->LUMO (3%), H-1->LUMO (3%)                 |
| 358.3151        | 0.0032        | H-7->LUMO (25%), H-7->L+2 (10%), H-3->LUMO (53%)                   | H-10->LUMO (2%), H-3->L+2 (7%)                                                 |
| 356.5223        | 0.1028        | H-2->LUMO (72%), H-2->L+2 (10%)                                    | H-15->L+2 (2%), H-4->L+2 (8%), H-3->L+1 (5%)                                   |
| 347.4504        | 0.0015        | H-7->LUMO (61%), H-7->L+2 (21%), H-3->LUMO (11%)                   |                                                                                |
| 337.7396        | 0.0125        | H-1->L+1 (95%)                                                     | H-2->L+1 (2%)                                                                  |
| 334.5048        | 0.3095        | H-4->LUMO (72%)                                                    | H-4->L+2 (2%), H-3->L+1 (9%), H-2->L+2 (7%), HOMO->L+1 (3%)                    |
| 332.2904        | 0.1828        | H-3->L+1 (75%)                                                     | H-4->LUMO (4%), H-4->L+2 (2%), H-2->LUMO (6%), H-2->L+1 (6%)                   |
| 332.237         | 0.2445        | H-2->L+1 (79%)                                                     | H-4->L+1 (7%), H-3->L+1 (6%), H-1->L+1 (3%)                                    |
| 324.9487        | 0.0207        | H-5->LUMO (18%), H-4->LUMO (10%), H-4->L+2 (34%), H-2->L+2 (18%)   | H-8->L+2 (4%), H-5->L+2 (7%), H-1->L+2 (5%)                                    |
| 320.5217        | 0.3297        | H-5->LUMO (77%)                                                    | H-4->L+2 (6%), H-2->L+2 (4%), H-1->L+2 (4%)                                    |
| 316.2701        | 0.0025        | H-1->L+2 (86%)                                                     | H-6->LUMO (4%), H-4->L+2 (3%), H-2->L+2 (5%)                                   |
| 316.0202        | 0.0076        | H-6->LUMO (89%)                                                    | H-7->LUMO (2%), H-1->L+2 (3%)                                                  |
| 309.3495        | 0.0021        | H-7->L+1 (91%)                                                     | H-6->L+1 (3%)                                                                  |
| 309.018         | 0.0217        | H-4->L+1 (64%), HOMO->L+3 (20%)                                    | H-13->L+2 (5%), H-2->L+1 (6%)                                                  |
| 307.3176        | 0.1032        | H-18->L+2 (17%), H-13->L+2 (50%)                                   | H-14->L+2 (3%), H-13->LUMO (2%), H-10->LUMO (5%), H-6->L+2 (3%), H-4->L+1 (7%) |
| 296.62          | 0.0888        | H-10->LUMO (24%), H-9->LUMO (11%), H-5->L+1 (40%), HOMO->L+3 (13%) | H-4->L+1 (5%)                                                                  |

|                 |        |                                                                    |                                                                                                |
|-----------------|--------|--------------------------------------------------------------------|------------------------------------------------------------------------------------------------|
| <b>295.9191</b> | 0.0045 | H-12->LUMO (20%), H-8->LUMO (67%)                                  | H-11->L+1 (5%)                                                                                 |
| <b>295.1794</b> | 0.0003 | H-11->LUMO (36%), H-9->LUMO (42%)                                  | H-12->L+1 (6%), H-10->LUMO (5%), HOMO->L+6 (2%)                                                |
| <b>293.704</b>  | 0.0327 | H-11->LUMO (24%), H-9->LUMO (42%), H-5->L+1 (13%)                  | H-12->L+1 (3%), H-10->LUMO (2%), H-4->L+1 (4%), HOMO->L+3 (6%)                                 |
| <b>292.2295</b> | 0.0089 | H-12->LUMO (56%), H-8->LUMO (24%)                                  | H-11->L+1 (7%)                                                                                 |
| <b>289.2637</b> | 0.0376 | H-11->LUMO (13%), H-10->LUMO (44%), H-5->L+1 (30%)                 |                                                                                                |
| <b>287.1733</b> | 0.0003 | H-6->L+1 (93%)                                                     | H-7->L+1 (3%)                                                                                  |
| <b>284.8967</b> | 0.0123 | H-5->L+1 (13%), HOMO->L+3 (54%)                                    | H-18->L+2 (5%), H-11->LUMO (3%), H-10->LUMO (7%), H-4->L+1 (8%)                                |
| <b>282.2891</b> | 0.0006 | HOMO->L+4 (91%)                                                    | HOMO->L+5 (7%)                                                                                 |
| <b>280.1586</b> | 0.0064 | H-5->L+2 (87%)                                                     | H-8->L+2 (2%), H-4->L+2 (4%), H-2->L+2 (4%)                                                    |
| <b>277.0906</b> | 0.025  | HOMO->L+5 (72%), HOMO->L+7 (14%)                                   | H-10->L+1 (3%), H-8->L+2 (2%), HOMO->L+4 (7%)                                                  |
| <b>275.962</b>  | 0.1398 | H-8->L+1 (85%)                                                     | H-13->LUMO (4%)                                                                                |
| <b>275.6858</b> | 0.0038 | H-13->LUMO (65%)                                                   | H-14->LUMO (7%), H-13->L+2 (2%), H-10->LUMO (2%), H-8->L+1 (4%), H-6->L+2 (4%), HOMO->L+6 (3%) |
| <b>274.277</b>  | 0.0175 | H-8->L+2 (79%)                                                     | H-16->L+2 (2%), H-4->L+2 (8%), HOMO->L+5 (3%)                                                  |
| <b>272.391</b>  | 0.0003 | HOMO->L+6 (75%)                                                    | H-13->LUMO (3%), H-12->L+1 (5%), H-11->LUMO (8%)                                               |
| <b>272.0861</b> | 0.0037 | H-12->LUMO (11%), HOMO->L+5 (11%), HOMO->L+7 (62%)                 | H-11->L+1 (7%), H-10->L+1 (3%)                                                                 |
| <b>270.903</b>  | 0.0003 | H-6->L+2 (87%)                                                     | H-13->LUMO (3%), H-13->L+2 (3%), H-7->L+2 (2%)                                                 |
| <b>270.4775</b> | 0.0477 | H-9->L+1 (82%)                                                     | H-10->L+1 (8%), HOMO->L+7 (5%)                                                                 |
| <b>269.133</b>  | 0.0168 | H-10->L+1 (73%), H-9->L+1 (14%)                                    | HOMO->L+7 (4%), HOMO->L+8 (4%)                                                                 |
| <b>266.7187</b> | 0.0378 | H-10->L+2 (63%), H-9->L+2 (17%)                                    | H-14->L+2 (3%), H-13->LUMO (4%), H-7->L+2 (4%)                                                 |
| <b>265.0594</b> | 0.0062 | H-11->L+1 (74%), HOMO->L+7 (10%)                                   | H-12->LUMO (6%), HOMO->L+5 (3%)                                                                |
| <b>264.9518</b> | 0.012  | H-12->L+1 (73%), HOMO->L+6 (11%)                                   | H-11->LUMO (7%)                                                                                |
| <b>259.5332</b> | 0.0373 | H-14->LUMO (16%), H-14->L+2 (11%), H-10->L+2 (20%), H-9->L+2 (32%) | H-17->LUMO (2%), H-17->L+2 (5%), H-13->LUMO (4%), H-3->L+2 (6%)                                |
| <b>257.6991</b> | 0.0134 | H-16->LUMO (18%), H-15->LUMO (18%), H-13->L+1 (52%)                | H-14->L+1 (3%)                                                                                 |
| <b>256.5792</b> | 0.016  | H-14->LUMO (49%), H-9->L+2 (31%)                                   | H-17->LUMO (5%), H-13->LUMO (3%), H-10->L+2 (4%)                                               |

|                 |        |                                  |                                                               |
|-----------------|--------|----------------------------------|---------------------------------------------------------------|
| <b>255.1745</b> | 0.0083 | H-12->L+2 (62%), H-11->L+2 (29%) | H-1->L+3 (4%)                                                 |
| <b>255.1168</b> | 0.0004 | H-1->L+3 (88%)                   | H-11->L+2 (7%)                                                |
| <b>255.0905</b> | 0.002  | H-12->L+2 (33%), H-11->L+2 (58%) | H-1->L+3 (4%)                                                 |
| <b>252.5548</b> | 0.0252 | HOMO->L+8 (76%)                  | H-15->LUMO (2%), H-10->L+1 (3%), H-4->L+3 (6%), H-2->L+3 (6%) |

**Table S13.** Major and minor transitions calculated using TD-DFT studies of Ni-4.

| Wavelength (nm) | Osc. Strength | Major contribs                                                                                                               | Minor contribs                                                                                                                                                                                        |
|-----------------|---------------|------------------------------------------------------------------------------------------------------------------------------|-------------------------------------------------------------------------------------------------------------------------------------------------------------------------------------------------------|
| 731.9451739     | 0.0001        | HOMO(A)->LUMO(A) (47%), HOMO(B)->LUMO(B) (45%)                                                                               |                                                                                                                                                                                                       |
| 576.4293692     | 0             | HOMO(A)->L+1(A) (44%),<br>HOMO(B)->L+1(B) (44%)                                                                              | H-3(A)->LUMO(A) (4%), H-2(B)->LUMO(B) (4%)                                                                                                                                                            |
| 540.5894616     | 0.0035        | H-16(B)->L+2(B) (37%), H-4(B)->L+2(B) (31%), HOMO(B)->L+2(B) (11%)                                                           | H-13(B)->L+2(B) (9%), H-4(B)->LUMO(B) (2%)                                                                                                                                                            |
| 506.7611911     | 0             | H-17(B)->L+2(B) (49%), H-3(B)->L+2(B) (24%)                                                                                  | H-1(A)->LUMO(A) (7%), H-17(B)->LUMO(B) (2%), H-7(B)->L+2(B) (4%), H-5(B)->L+2(B) (4%), H-2(B)->L+2(B) (3%)                                                                                            |
| 501.8587048     | 0.2387        | HOMO(A)->LUMO(A) (28%),<br>HOMO(B)->LUMO(B) (32%),<br>HOMO(B)->L+2(B) (29%)                                                  | H-16(B)->L+2(B) (4%), H-4(B)->L+2(B) (4%)                                                                                                                                                             |
| 488.3767007     | 0.0787        | H-14(B)->L+2(B) (14%), H-12(B)->L+2(B) (27%),<br>HOMO(B)->L+2(B) (33%)                                                       | HOMO(A)->LUMO(A) (7%), H-16(B)->L+2(B) (2%), H-13(B)->L+2(B) (2%), HOMO(B)->LUMO(B) (7%)                                                                                                              |
| 480.5588876     | 0.1211        | HOMO(A)->LUMO(A) (10%),<br>H-14(B)->L+2(B) (32%), H-12(B)->L+2(B) (15%),<br>HOMO(B)->LUMO(B) (10%),<br>HOMO(B)->L+2(B) (24%) | H-19(B)->L+2(B) (4%)                                                                                                                                                                                  |
| 453.6394315     | 0.0015        | H-1(A)->LUMO(A) (87%)                                                                                                        | H-17(B)->L+2(B) (4%), H-3(B)->L+2(B) (2%)                                                                                                                                                             |
| 453.5564567     | 0.0451        | H-23(B)->L+2(B) (25%), H-19(B)->L+2(B) (36%), H-12(B)->L+2(B) (11%)                                                          | H-1(A)->LUMO(A) (3%), HOMO(A)->LUMO(A) (2%), H-32(B)->L+2(B) (3%), H-16(B)->L+2(B) (3%), H-14(B)->L+2(B) (5%), HOMO(B)->LUMO(B) (2%), HOMO(B)->L+2(B) (2%)                                            |
| 433.480851      | 0.3488        | HOMO(A)->L+1(A) (47%),<br>HOMO(B)->L+1(B) (45%)                                                                              | H-3(A)->LUMO(A) (2%), H-2(B)->LUMO(B) (2%)                                                                                                                                                            |
| 408.5550236     | 0             | H-5(A)->LUMO(A) (16%), H-4(B)->LUMO(B) (22%)                                                                                 | H-7(A)->LUMO(A) (2%), H-6(A)->L+1(A) (3%), H-4(A)->L+1(A) (2%),<br>H-3(A)->L+1(A) (7%), H-1(A)->L+1(A) (4%), HOMO(A)->L+2(A) (9%), H-3(B)->L+1(B) (4%), H-2(B)->L+1(B) (8%), HOMO(B)->L+3(B) (9%)     |
| 405.826955      | 0.0001        | H-3(A)->LUMO(A) (34%), H-2(B)->LUMO(B) (35%)                                                                                 | H-8(A)->LUMO(A) (2%), H-6(A)->LUMO(A) (4%), H-5(A)->L+1(A) (2%), HOMO(A)->L+1(A) (3%), H-7(B)->LUMO(B) (2%), H-5(B)->LUMO(B) (2%), H-4(B)->L+1(B) (3%), H-3(B)->LUMO(B) (2%),<br>HOMO(B)->L+1(B) (3%) |

|                    |        |                                                                                        |                                                                                                                                                                                                                                                                       |
|--------------------|--------|----------------------------------------------------------------------------------------|-----------------------------------------------------------------------------------------------------------------------------------------------------------------------------------------------------------------------------------------------------------------------|
| <b>394.8666932</b> | 0      | H-1(A)->L+1(A) (63%)                                                                   | H-10(A)->LUMO(A) (3%), H-3(A)->L+1(A) (3%), HOMO(A)->L+2(A) (5%), H-9(B)->LUMO(B) (3%), H-7(B)->L+1(B) (2%), H-2(B)->L+1(B) (3%), HOMO(B)->L+3(B) (5%)                                                                                                                |
| <b>393.4382414</b> | 0.0011 | H-4(A)->LUMO(A) (23%), H-3(B)->LUMO(B) (33%)                                           | H-6(A)->LUMO(A) (6%), H-5(A)->L+1(A) (7%), H-3(A)->LUMO(A) (6%), HOMO(A)->L+1(A) (2%), H-4(B)->L+1(B) (9%), H-2(B)->LUMO(B) (3%), HOMO(B)->L+1(B) (2%)                                                                                                                |
| <b>385.7868972</b> | 0      | H-1(A)->L+1(A) (27%), H-4(B)->LUMO(B) (12%)                                            | H-8(A)->L+1(A) (3%), H-5(A)->LUMO(A) (9%), H-4(A)->L+1(A) (4%), H-3(A)->L+1(A) (4%), HOMO(A)->L+2(A) (7%), H-9(B)->LUMO(B) (2%), H-7(B)->L+1(B) (3%), H-3(B)->L+1(B) (4%), H-2(B)->L+1(B) (3%), HOMO(B)->L+3(B) (7%)                                                  |
| <b>378.4621276</b> | 0      | H-8(A)->LUMO(A) (21%), H-7(B)->LUMO(B) (21%)                                           | H-12(A)->L+4(A) (2%), H-11(A)->L+3(A) (2%), H-10(A)->L+1(A) (8%), H-9(A)->L+1(A) (2%), H-8(A)->L+2(A) (2%), H-5(A)->L+1(A) (2%), H-11(B)->L+5(B) (2%), H-10(B)->L+4(B) (2%), H-9(B)->L+1(B) (8%), H-8(B)->L+1(B) (3%), H-7(B)->L+3(B) (2%), H-4(B)->L+1(B) (2%)       |
| <b>372.4926934</b> | 0.0007 | H-2(A)->LUMO(A) (94%)                                                                  | H-1(B)->LUMO(B) (3%)                                                                                                                                                                                                                                                  |
| <b>368.9786114</b> | 0.002  | H-1(B)->LUMO(B) (94%)                                                                  | H-2(A)->LUMO(A) (3%)                                                                                                                                                                                                                                                  |
| <b>364.2629874</b> | 0.0001 | H-8(A)->L+1(A) (10%), H-7(B)->L+1(B) (10%), H-3(B)->L+1(B) (13%)                       | H-13(A)->LUMO(A) (2%), H-10(A)->LUMO(A) (9%), H-9(A)->LUMO(A) (2%), H-6(A)->L+1(A) (2%), H-4(A)->L+1(A) (7%), H-3(A)->L+1(A) (6%), HOMO(A)->L+2(A) (2%), H-13(B)->LUMO(B) (2%), H-9(B)->LUMO(B) (9%), H-8(B)->LUMO(B) (2%), H-2(B)->L+1(B) (4%), HOMO(B)->L+3(B) (2%) |
| <b>351.4191577</b> | 0.3881 | H-3(A)->LUMO(A) (33%), H-2(B)->LUMO(B) (34%), H-2(B)->L+2(B) (19%)                     | H-4(A)->LUMO(A) (2%)                                                                                                                                                                                                                                                  |
| <b>348.8581683</b> | 0.0001 | H-3(A)->L+1(A) (11%), H-2(A)->L+6(A) (10%), H-2(B)->L+1(B) (11%), H-1(B)->L+7(B) (10%) | H-9(A)->L+8(A) (2%), H-7(A)->L+9(A) (4%), H-6(A)->L+5(A) (2%), H-2(A)->L+5(A) (3%), HOMO(A)->L+2(A) (7%), H-8(B)->L+9(B) (2%), H-6(B)->L+10(B) (4%), H-5(B)->L+6(B) (3%), H-1(B)->L+6(B) (3%), HOMO(B)->L+3(B) (7%)                                                   |
| <b>344.7644542</b> | 0.0002 | H-3(A)->L+1(A) (11%), HOMO(A)->L+2(A) (11%), H-                                        | H-7(A)->L+9(A) (3%), H-4(A)->L+1(A) (2%), H-2(A)->L+5(A) (3%),                                                                                                                                                                                                        |

|                    |        |                                                                    |                                                                                                                                                                                                                                                                                                                                                                       |
|--------------------|--------|--------------------------------------------------------------------|-----------------------------------------------------------------------------------------------------------------------------------------------------------------------------------------------------------------------------------------------------------------------------------------------------------------------------------------------------------------------|
|                    |        | 2(B)->L+1(B) (11%), HOMO(B)->L+3(B) (11%)                          | H-2(A)->L+6(A) (7%), HOMO(A)->LUMO(A) (2%), H-6(B)->L+10(B) (3%), H-5(B)->L+1(B) (2%), H-5(B)->L+6(B) (2%), H-1(B)->L+6(B) (2%), H-1(B)->L+7(B) (7%), HOMO(B)->LUMO(B) (2%)                                                                                                                                                                                           |
| <b>343.3228838</b> | 0.0857 | H-2(B)->L+2(B) (63%)                                               | H-4(A)->LUMO(A) (5%), H-3(A)->LUMO(A) (7%), H-7(B)->L+2(B) (5%), H-5(B)->L+2(B) (2%), H-3(B)->LUMO(B) (2%), H-2(B)->LUMO(B) (9%)                                                                                                                                                                                                                                      |
| <b>337.5464676</b> | 0.0032 | H-4(A)->L+1(A) (13%), H-4(B)->LUMO(B) (29%), H-3(B)->L+1(B) (19%)  | H-10(A)->LUMO(A) (2%), H-6(A)->L+1(A) (5%), H-5(A)->L+2(A) (2%), H-2(A)->L+1(A) (3%), H-9(B)->LUMO(B) (3%), H-4(B)->L+3(B) (3%), H-2(B)->L+1(B) (4%), H-1(B)->L+1(B) (3%)                                                                                                                                                                                             |
| <b>335.4187669</b> | 0.0004 | H-2(A)->L+9(A) (13%), H-1(B)->L+10(B) (13%)                        | H-9(A)->L+3(A) (2%), H-9(A)->L+5(A) (3%), H-9(A)->L+6(A) (2%), H-7(A)->L+5(A) (3%), H-7(A)->L+6(A) (7%), H-6(A)->LUMO(A) (3%), H-6(A)->L+8(A) (3%), H-5(A)->L+6(A) (2%), H-4(A)->L+8(A) (2%), H-2(A)->L+1(A) (2%), H-8(B)->L+4(B) (2%), H-8(B)->L+6(B) (3%), H-8(B)->L+7(B) (2%), H-6(B)->L+6(B) (3%), H-6(B)->L+7(B) (9%), H-5(B)->LUMO(B) (3%), H-5(B)->L+9(B) (5%) |
| <b>334.5950425</b> | 0.0004 | H-2(A)->L+1(A) (56%), H-1(B)->L+1(B) (27%)                         | H-2(B)->L+1(B) (3%)                                                                                                                                                                                                                                                                                                                                                   |
| <b>333.9011985</b> | 0.0017 | H-5(A)->LUMO(A) (31%), H-4(B)->LUMO(B) (14%), H-1(B)->L+1(B) (22%) | H-10(A)->LUMO(A) (2%), H-3(A)->L+1(A) (6%), H-2(A)->L+1(A) (8%), H-3(B)->L+1(B) (5%), H-2(B)->L+1(B) (7%)                                                                                                                                                                                                                                                             |
| <b>332.593468</b>  | 0      | H-5(A)->LUMO(A) (14%), H-2(A)->L+1(A) (25%), H-1(B)->L+1(B) (42%)  | H-7(A)->LUMO(A) (3%), H-4(B)->LUMO(B) (6%), H-3(B)->L+1(B) (2%), H-2(B)->L+1(B) (3%)                                                                                                                                                                                                                                                                                  |
| <b>329.8153677</b> | 0.4529 | H-4(A)->LUMO(A) (19%), H-3(B)->LUMO(B) (49%)                       | H-6(A)->LUMO(A) (8%), H-5(A)->L+1(A) (4%), H-3(A)->LUMO(A) (5%), HOMO(A)->L+1(A) (2%), H-2(B)->LUMO(B) (3%)                                                                                                                                                                                                                                                           |
| <b>328.1220373</b> | 0.0495 | H-5(A)->L+1(A) (11%), H-4(A)->LUMO(A) (21%), H-4(B)->L+1(B) (39%)  | H-10(A)->L+1(A) (3%), H-6(A)->LUMO(A) (2%), H-9(B)->L+1(B) (3%), H-3(B)->LUMO(B) (2%), H-3(B)->L+3(B) (2%), H-2(B)->LUMO(B) (2%), H-2(B)->L+3(B) (2%)                                                                                                                                                                                                                 |
| <b>325.3153679</b> | 0.0476 | H-5(A)->LUMO(A) (13%), H-3(A)->L+1(A) (39%), H-2(B)-               | H-6(A)->L+1(A) (3%), H-4(A)->L+1(A) (2%), H-4(B)->LUMO(B)                                                                                                                                                                                                                                                                                                             |

|                    |        |                                                                                              |                                                                                                                                                                                                                           |
|--------------------|--------|----------------------------------------------------------------------------------------------|---------------------------------------------------------------------------------------------------------------------------------------------------------------------------------------------------------------------------|
|                    |        | >L+1(B) (32%)                                                                                | (5%)                                                                                                                                                                                                                      |
| <b>324.6169372</b> | 0.0008 | H-12(A)->L+1(A) (15%), H-11(A)->LUMO(A) (29%), H-11(B)->L+1(B) (14%), H-10(B)->LUMO(B) (24%) | H-11(A)->L+2(A) (2%), H-10(B)->L+3(B) (2%)                                                                                                                                                                                |
| <b>324.5404628</b> | 0.0006 | H-12(A)->LUMO(A) (30%), H-11(A)->L+1(A) (15%), H-11(B)->LUMO(B) (26%), H-10(B)->L+1(B) (14%) | H-12(A)->L+2(A) (2%), H-11(B)->L+3(B) (2%)                                                                                                                                                                                |
| <b>320.1823025</b> | 0.008  | H-6(A)->LUMO(A) (60%), H-4(A)->LUMO(A) (17%)                                                 | H-3(A)->LUMO(A) (2%), H-5(B)->LUMO(B) (6%), H-4(B)->L+1(B) (2%)                                                                                                                                                           |
| <b>319.3658055</b> | 0.0005 | H-7(A)->LUMO(A) (79%)                                                                        | H-5(A)->LUMO(A) (6%), H-2(A)->L+1(A) (2%), H-6(B)->LUMO(B) (7%)                                                                                                                                                           |
| <b>317.6719696</b> | 0.0324 | H-6(B)->LUMO(B) (10%), H-5(B)->LUMO(B) (73%)                                                 | H-6(A)->LUMO(A) (6%), H-4(A)->LUMO(A) (3%), H-3(B)->LUMO(B) (2%)                                                                                                                                                          |
| <b>316.8601115</b> | 0.0089 | H-6(B)->LUMO(B) (77%)                                                                        | H-7(A)->LUMO(A) (8%), H-5(B)->LUMO(B) (8%)                                                                                                                                                                                |
| <b>315.9557427</b> | 0.0024 | H-1(B)->L+2(B) (95%)                                                                         | H-5(B)->LUMO(B) (2%), H-2(B)->L+2(B) (2%)                                                                                                                                                                                 |
| <b>307.5386159</b> | 0.004  | H-4(A)->L+1(A) (26%), HOMO(A)->L+2(A) (16%), H-3(B)->L+1(B) (27%), HOMO(B)->L+3(B) (15%)     | H-6(A)->L+1(A) (7%)                                                                                                                                                                                                       |
| <b>307.4471025</b> | 0.018  | H-5(A)->L+1(A) (50%), H-4(B)->L+1(B) (33%)                                                   | H-10(A)->L+1(A) (2%), H-7(A)->L+1(A) (4%), H-6(A)->LUMO(A) (2%)                                                                                                                                                           |
| <b>302.1646349</b> | 0.0065 | H-17(B)->L+2(B) (15%), H-7(B)->L+2(B) (10%), H-3(B)->L+2(B) (59%)                            | H-7(B)->LUMO(B) (6%)                                                                                                                                                                                                      |
| <b>297.3384647</b> | 0.0023 | H-9(A)->LUMO(A) (47%), H-6(A)->L+1(A) (12%), H-8(B)->LUMO(B) (11%)                           | H-10(A)->LUMO(A) (7%), H-4(A)->L+1(A) (4%), H-2(A)->L+6(A) (2%), H-5(B)->L+1(B) (6%), H-1(B)->L+7(B) (2%)                                                                                                                 |
| <b>296.081655</b>  | 0.1291 | H-10(A)->LUMO(A) (13%), H-9(A)->LUMO(A) (10%), H-9(B)->LUMO(B) (18%), H-8(B)->LUMO(B) (10%)  | H-11(A)->LUMO(A) (6%), H-8(A)->L+1(A) (2%), H-6(A)->L+1(A) (2%), HOMO(A)->L+2(A) (2%), H-16(B)->L+2(B) (2%), H-12(B)->LUMO(B) (3%), H-10(B)->LUMO(B) (6%), H-5(B)->L+1(B) (2%), H-4(B)->L+2(B) (5%), HOMO(B)->L+3(B) (2%) |
| <b>295.5804916</b> | 0.011  | H-7(B)->LUMO(B) (13%)                                                                        | H-12(A)->LUMO(A) (2%), H-12(A)->L+4(A) (5%), H-11(A)->L+3(A) (4%), H-10(A)->LUMO(A) (2%), H-9(A)->LUMO(A) (2%), H-8(A)->LUMO(A) (7%), HOMO(A)->L+3(A) (5%), HOMO(A)->L+7(A) (2%), H-17(B)->L+2(B) (3%), H-                |



|             |        |                                                                                              |                                                                                                                                                                                                                                                                          |
|-------------|--------|----------------------------------------------------------------------------------------------|--------------------------------------------------------------------------------------------------------------------------------------------------------------------------------------------------------------------------------------------------------------------------|
|             |        |                                                                                              | 11(B)->L+5(B) (5%), H-10(B)->L+4(B) (4%), H-8(B)->LUMO(B) (5%), H-5(B)->L+1(B) (5%), H-4(B)->L+2(B) (2%), H-3(B)->L+2(B) (6%), HOMO(B)->L+4(B) (3%), HOMO(B)->L+6(B) (2%), HOMO(B)->L+8(B) (2%)                                                                          |
| 295.5452624 | 0.0383 | H-8(B)->LUMO(B) (18%), H-5(B)->L+1(B) (15%)                                                  | H-12(A)->L+4(A) (2%), H-10(A)->LUMO(A) (5%), H-9(A)->LUMO(A) (6%), H-8(A)->LUMO(A) (2%), H-6(A)->L+1(A) (3%), HOMO(A)->L+2(A) (4%), H-16(B)->L+2(B) (2%), H-9(B)->LUMO(B) (5%), H-7(B)->LUMO(B) (4%), H-4(B)->L+2(B) (6%), H-3(B)->L+2(B) (2%), HOMO(B)->L+3(B) (4%)     |
| 294.7022724 | 0.0166 | H-12(A)->LUMO(A) (17%), H-8(A)->LUMO(A) (26%), H-11(B)->LUMO(B) (21%), H-7(B)->LUMO(B) (13%) | H-11(A)->L+1(A) (3%), HOMO(A)->L+5(A) (2%), H-10(B)->L+1(B) (4%), HOMO(B)->L+4(B) (3%)                                                                                                                                                                                   |
| 293.9616213 | 0.0079 | H-16(B)->L+2(B) (16%), H-4(B)->L+2(B) (35%)                                                  | H-11(A)->LUMO(A) (5%), H-9(A)->LUMO(A) (4%), H-13(B)->L+2(B) (4%), H-10(B)->LUMO(B) (6%), H-9(B)->L+2(B) (4%), H-8(B)->LUMO(B) (5%), H-5(B)->L+1(B) (7%)                                                                                                                 |
| 293.238554  | 0.0737 | H-11(A)->LUMO(A) (17%), H-9(A)->LUMO(A) (13%), H-6(A)->L+1(A) (10%), H-10(B)->LUMO(B) (14%)  | H-12(A)->L+1(A) (2%), H-3(A)->L+1(A) (2%), HOMO(A)->L+2(A) (7%), HOMO(A)->L+4(A) (4%), H-11(B)->L+1(B) (3%), H-9(B)->LUMO(B) (2%), H-8(B)->LUMO(B) (8%), H-3(B)->L+1(B) (4%), HOMO(B)->L+3(B) (5%), HOMO(B)->L+5(B) (2%)                                                 |
| 292.8160999 | 0.0002 | H-10(A)->LUMO(A) (18%), H-9(B)->LUMO(B) (15%)                                                | H-12(A)->L+3(A) (5%), H-12(A)->L+5(A) (2%), H-11(A)->L+4(A) (7%), H-6(A)->L+1(A) (3%), H-5(A)->LUMO(A) (2%), H-13(B)->LUMO(B) (2%), H-12(B)->LUMO(B) (2%), H-11(B)->L+4(B) (6%), H-11(B)->L+6(B) (2%), H-10(B)->LUMO(B) (5%), H-10(B)->L+5(B) (7%), HOMO(B)->L+5(B) (3%) |
| 292.4431385 | 0.0003 | H-7(A)->L+1(A) (24%), H-8(B)->LUMO(B) (11%), H-6(B)->L+1(B) (24%)                            | H-9(A)->LUMO(A) (2%), H-6(A)->L+1(A) (8%), H-5(A)->L+1(A) (3%), H-4(A)->L+1(A) (4%), H-5(B)->L+1(B) (7%)                                                                                                                                                                 |
| 292.1468296 | 0.0001 | H-7(A)->L+1(A) (18%), H-6(A)->L+1(A) (12%), H-8(B)-                                          | H-9(A)->LUMO(A) (5%), H-4(A)->L+1(A) (6%), H-5(B)->L+1(B) (9%)                                                                                                                                                                                                           |

|                    |        |                                                                                                                                          |                                                                                                                                                                                                                                                    |
|--------------------|--------|------------------------------------------------------------------------------------------------------------------------------------------|----------------------------------------------------------------------------------------------------------------------------------------------------------------------------------------------------------------------------------------------------|
|                    |        | >LUMO(B) (16%), H-6(B)->L+1(B) (17%)                                                                                                     |                                                                                                                                                                                                                                                    |
| <b>290.7355915</b> | 0.0039 | H-12(A)->LUMO(A) (15%), H-8(A)->LUMO(A) (24%), H-11(B)->LUMO(B) (15%), H-7(B)->LUMO(B) (23%)                                             | H-11(A)->L+1(A) (2%), HOMO(A)->L+3(A) (6%), H-10(B)->L+1(B) (2%), HOMO(B)->L+4(B) (4%)                                                                                                                                                             |
| <b>290.0554287</b> | 0.0071 | H-7(A)->L+1(A) (18%), H-6(A)->L+1(A) (11%), H-6(B)->L+1(B) (21%), H-5(B)->L+1(B) (22%)                                                   | H-10(A)->LUMO(A) (3%), H-5(A)->L+1(A) (2%), H-4(A)->L+1(A) (7%), H-9(B)->LUMO(B) (4%), H-3(B)->L+1(B) (2%)                                                                                                                                         |
| <b>289.560916</b>  | 0.0068 | H-7(A)->L+1(A) (25%), H-6(B)->L+1(B) (28%), H-5(B)->L+1(B) (14%)                                                                         | H-10(A)->LUMO(A) (4%), H-6(A)->L+1(A) (6%), H-5(A)->L+1(A) (2%), H-4(A)->L+1(A) (6%), H-9(B)->LUMO(B) (5%)                                                                                                                                         |
| <b>288.2682934</b> | 0.0001 | HOMO(A)->L+5(A) (15%), HOMO(A)->L+6(A) (17%), HOMO(B)->L+6(B) (24%), HOMO(B)->L+7(B) (33%)                                               | H-7(A)->L+1(A) (2%), HOMO(B)->L+4(B) (2%)                                                                                                                                                                                                          |
| <b>287.5862707</b> | 0.0019 | HOMO(A)->L+4(A) (11%), HOMO(B)->L+3(B) (12%), HOMO(B)->L+5(B) (11%)                                                                      | H-11(A)->LUMO(A) (9%), H-10(A)->LUMO(A) (3%), H-4(A)->L+1(A) (4%), HOMO(A)->L+2(A) (7%), H-12(B)->LUMO(B) (9%), H-10(B)->LUMO(B) (3%), H-9(B)->LUMO(B) (6%), H-4(B)->L+2(B) (2%), H-3(B)->L+1(B) (4%)                                              |
| <b>287.0735442</b> | 0.0087 | HOMO(A)->L+4(A) (25%), HOMO(B)->L+5(B) (25%)                                                                                             | H-10(A)->LUMO(A) (9%), H-4(A)->L+1(A) (2%), HOMO(A)->L+2(A) (6%), HOMO(A)->L+6(A) (2%), H-10(B)->LUMO(B) (6%), HOMO(B)->L+3(B) (2%)                                                                                                                |
| <b>286.967233</b>  | 0.0002 | HOMO(A)->L+3(A) (31%), HOMO(B)->L+4(B) (38%)                                                                                             | H-8(A)->LUMO(A) (2%), H-8(A)->L+4(A) (2%), HOMO(A)->L+5(A) (4%), H-7(B)->L+5(B) (2%), HOMO(B)->L+6(B) (3%)                                                                                                                                         |
| <b>286.3574682</b> | 0.001  | HOMO(A)->L+5(A) (20%), HOMO(A)->L+6(A) (35%), HOMO(B)->L+7(B) (25%)                                                                      | HOMO(B)->L+6(B) (9%)                                                                                                                                                                                                                               |
| <b>285.414809</b>  | 0.0002 | HOMO(A)->L+5(A) (15%), HOMO(A)->L+6(A) (21%), HOMO(B)->L+6(B) (25%), HOMO(B)->L+7(B) (22%)                                               |                                                                                                                                                                                                                                                    |
| <b>283.7166888</b> | 0.0185 | H-12(B)->LUMO(B) (49%)                                                                                                                   | H-14(A)->LUMO(A) (5%), H-12(A)->L+3(A) (2%), H-11(A)->L+4(A) (2%), H-10(A)->LUMO(A) (2%), H-15(B)->L+1(B) (6%), H-14(B)->LUMO(B) (2%), H-11(B)->L+4(B) (2%), H-10(B)->L+5(B) (2%), H-9(B)->LUMO(B) (4%), H-7(B)->L+1(B) (2%), HOMO(B)->L+5(B) (6%) |
| <b>282.5142255</b> | 0.0148 | HOMO(A)->L+3(A) (19%), HOMO(A)->L+5(A) (18%), HOMO(A)->L+6(A) (16%), HOMO(B)->L+4(B) (15%), HOMO(B)->L+6(B) (14%), HOMO(B)->L+7(B) (11%) |                                                                                                                                                                                                                                                    |

|                    |        |                                                                                            |                                                                                                                                                                                                                                                                     |
|--------------------|--------|--------------------------------------------------------------------------------------------|---------------------------------------------------------------------------------------------------------------------------------------------------------------------------------------------------------------------------------------------------------------------|
| <b>280.3423168</b> | 0.0054 | H-7(B)->L+1(B) (26%)                                                                       | H-13(A)->LUMO(A) (4%), H-12(A)->L+3(A) (5%), H-11(A)->L+4(A) (6%), H-8(A)->L+1(A) (9%), H-13(B)->LUMO(B) (2%), H-12(B)->LUMO(B) (2%), H-11(B)->L+4(B) (5%), H-10(B)->L+5(B) (6%), H-9(B)->LUMO(B) (6%), H-8(B)->LUMO(B) (2%)                                        |
| <b>279.9372161</b> | 0.0001 | H-2(A)->L+5(A) (14%), H-1(B)->L+6(B) (14%)                                                 | H-7(A)->L+8(A) (4%), H-2(A)->L+3(A) (7%), H-2(A)->L+6(A) (7%), H-2(A)->L+7(A) (2%), H-12(B)->LUMO(B) (2%), H-7(B)->L+1(B) (2%), H-6(B)->L+9(B) (4%), H-5(B)->L+2(B) (8%), H-5(B)->L+7(B) (2%), H-1(B)->L+4(B) (7%), H-1(B)->L+7(B) (6%)                             |
| <b>279.8045474</b> | 0.0005 | H-5(B)->L+2(B) (75%)                                                                       | H-2(A)->L+5(A) (2%), H-7(B)->L+2(B) (5%), H-3(B)->L+2(B) (2%), H-2(B)->L+2(B) (5%), H-1(B)->L+6(B) (2%)                                                                                                                                                             |
| <b>278.8166614</b> | 0.0007 | H-10(A)->L+1(A) (13%), H-9(B)->L+1(B) (20%)                                                | H-12(A)->L+4(A) (6%), H-11(A)->L+3(A) (4%), H-9(A)->L+1(A) (4%), H-8(A)->LUMO(A) (5%), H-1(A)->L+2(A) (2%), H-15(B)->LUMO(B) (3%), H-12(B)->L+1(B) (3%), H-11(B)->L+5(B) (6%), H-10(B)->L+4(B) (4%), H-8(B)->L+1(B) (7%), H-7(B)->LUMO(B) (6%), H-5(B)->L+2(B) (2%) |
| <b>278.1785798</b> | 0.018  | HOMO(A)->L+3(A) (24%), HOMO(A)->L+5(A) (15%), HOMO(B)->L+4(B) (23%), HOMO(B)->L+6(B) (14%) | H-12(A)->LUMO(A) (7%), HOMO(A)->L+6(A) (3%), H-11(B)->LUMO(B) (8%), HOMO(B)->L+7(B) (3%)                                                                                                                                                                            |
| <b>278.0351019</b> | 0.0043 | HOMO(A)->L+4(A) (41%), HOMO(B)->L+5(B) (36%)                                               | H-11(A)->LUMO(A) (6%), H-10(B)->LUMO(B) (6%), H-6(B)->L+2(B) (4%)                                                                                                                                                                                                   |
| <b>276.9606242</b> | 0.0167 | H-6(B)->L+2(B) (88%)                                                                       | HOMO(B)->L+5(B) (2%)                                                                                                                                                                                                                                                |
| <b>276.1033137</b> | 0.1601 | H-8(A)->L+1(A) (24%), H-7(B)->L+1(B) (35%)                                                 | H-13(A)->LUMO(A) (5%), H-13(B)->LUMO(B) (8%), H-9(B)->LUMO(B) (3%), H-9(B)->L+2(B) (2%), H-6(B)->L+2(B) (3%), HOMO(B)->L+3(B) (2%), HOMO(B)->L+11(B) (2%)                                                                                                           |
| <b>276.0418413</b> | 0.0036 | H-1(A)->L+2(A) (11%), H-15(B)->LUMO(B) (24%), H-12(B)->L+1(B) (16%)                        | H-15(A)->LUMO(A) (7%), H-14(A)->L+1(A) (4%), H-12(A)->L+4(A) (2%), H-11(A)->L+3(A) (2%), H-10(A)->L+1(A) (2%), HOMO(A)->L+7(A) (3%), H-14(B)->L+1(B) (2%), H-11(B)->L+5(B) (2%), H-10(B)->L+4(B) (2%), H-5(B)->L+2(B) (2%), HOMO(B)->L+8(B) (3%)                    |

|                    |        |                                                                                              |                                                                                                                                                                                                                                                                                                                                                                                                                                        |
|--------------------|--------|----------------------------------------------------------------------------------------------|----------------------------------------------------------------------------------------------------------------------------------------------------------------------------------------------------------------------------------------------------------------------------------------------------------------------------------------------------------------------------------------------------------------------------------------|
| <b>274.422738</b>  | 0.0499 | H-13(A)->LUMO(A) (12%), H-8(A)->L+1(A) (35%), H-13(B)->LUMO(B) (11%)                         | H-10(A)->LUMO(A) (4%), HOMO(A)->L+2(A) (2%), HOMO(A)->L+8(A) (3%), HOMO(A)->L+10(A) (2%), HOMO(B)->L+3(B) (2%), HOMO(B)->L+9(B) (2%)                                                                                                                                                                                                                                                                                                   |
| <b>273.8106336</b> | 0.0008 | H-9(A)->L+1(A) (27%), H-9(B)->L+1(B) (10%), H-8(B)->L+1(B) (21%)                             | H-10(A)->L+1(A) (9%), H-7(A)->L+6(A) (2%), H-2(A)->L+9(A) (3%), HOMO(A)->L+7(A) (2%), H-6(B)->L+7(B) (2%), H-1(B)->L+10(B) (3%), HOMO(B)->L+8(B) (2%)                                                                                                                                                                                                                                                                                  |
| <b>272.7384963</b> | 0.0005 | HOMO(A)->L+7(A) (19%), HOMO(B)->L+8(B) (20%)                                                 | H-10(A)->L+1(A) (2%), H-9(A)->L+1(A) (7%), H-3(A)->L+2(A) (7%), H-1(A)->L+2(A) (3%), H-15(B)->LUMO(B) (3%), H-8(B)->L+1(B) (6%), H-2(B)->L+3(B) (7%)                                                                                                                                                                                                                                                                                   |
| <b>272.6785129</b> | 0.0004 |                                                                                              | H-13(A)->LUMO(A) (3%), H-9(A)->L+8(A) (4%), H-8(A)->L+1(A) (3%), H-6(A)->L+3(A) (2%), H-6(A)->L+5(A) (4%), H-6(A)->L+6(A) (2%), H-4(A)->L+1(A) (2%), H-4(A)->L+5(A) (3%), H-3(A)->L+5(A) (2%), H-2(A)->L+5(A) (3%), H-2(A)->L+6(A) (7%), H-13(B)->LUMO(B) (3%), H-8(B)->L+9(B) (4%), H-5(B)->L+1(B) (3%), H-5(B)->L+4(B) (3%), H-5(B)->L+6(B) (7%), H-5(B)->L+7(B) (3%), H-2(B)->L+6(B) (2%), H-1(B)->L+6(B) (3%), H-1(B)->L+7(B) (7%) |
| <b>271.4249283</b> | 0.0681 | H-9(A)->L+1(A) (38%), H-8(B)->L+1(B) (40%)                                                   | H-10(A)->L+1(A) (6%), H-1(A)->L+2(A) (2%), HOMO(A)->L+7(A) (2%), H-7(B)->L+2(B) (4%), HOMO(B)->L+8(B) (2%)                                                                                                                                                                                                                                                                                                                             |
| <b>270.849775</b>  | 0.0295 | H-9(B)->L+2(B) (64%), H-8(B)->L+2(B) (17%)                                                   | H-7(B)->L+1(B) (5%), H-4(B)->L+2(B) (5%)                                                                                                                                                                                                                                                                                                                                                                                               |
| <b>270.0768794</b> | 0.0303 | H-10(A)->L+1(A) (32%), H-9(B)->L+1(B) (21%), H-7(B)->L+2(B) (15%)                            | H-9(A)->L+1(A) (7%), HOMO(A)->L+7(A) (2%), H-17(B)->L+2(B) (3%), H-8(B)->L+1(B) (9%), HOMO(B)->L+8(B) (2%)                                                                                                                                                                                                                                                                                                                             |
| <b>269.7067501</b> | 0.0035 | H-9(B)->L+1(B) (15%), H-7(B)->L+2(B) (47%)                                                   | H-10(A)->L+1(A) (5%), H-1(A)->L+2(A) (8%), H-17(B)->L+2(B) (7%), H-5(B)->L+2(B) (3%), H-2(B)->L+2(B) (2%)                                                                                                                                                                                                                                                                                                                              |
| <b>268.8995251</b> | 0      | H-12(A)->LUMO(A) (16%), H-11(A)->L+1(A) (30%), H-11(B)->LUMO(B) (17%), H-10(B)->L+1(B) (27%) | H-11(B)->L+2(B) (2%)                                                                                                                                                                                                                                                                                                                                                                                                                   |
| <b>268.6722712</b> | 0      | H-12(A)->L+1(A) (30%), H-11(A)->LUMO(A) (16%), H-                                            | H-10(B)->L+2(B) (2%)                                                                                                                                                                                                                                                                                                                                                                                                                   |

|             |        |                                                                                          |                                                                                                                                                                                                                                                                                                                              |
|-------------|--------|------------------------------------------------------------------------------------------|------------------------------------------------------------------------------------------------------------------------------------------------------------------------------------------------------------------------------------------------------------------------------------------------------------------------------|
|             |        | 11(B)->L+1(B) (26%), H-10(B)->LUMO(B) (17%)                                              |                                                                                                                                                                                                                                                                                                                              |
| 267.0231586 | 0.0006 | H-2(A)->L+8(A) (16%), H-1(B)->L+9(B) (16%)                                               | H-9(A)->L+6(A) (2%), H-7(A)->L+1(A) (3%), H-7(A)->L+3(A) (3%), H-7(A)->L+5(A) (8%), H-7(A)->L+6(A) (3%), H-6(A)->L+9(A) (2%), H-2(A)->L+10(A) (3%), H-1(A)->L+2(A) (5%), H-8(B)->L+7(B) (2%), H-6(B)->L+1(B) (2%), H-6(B)->L+4(B) (4%), H-6(B)->L+6(B) (8%), H-6(B)->L+7(B) (4%), H-5(B)->L+10(B) (2%), H-1(B)->L+11(B) (3%) |
| 266.1575961 | 0.0097 | H-1(A)->L+2(A) (42%), H-15(B)->LUMO(B) (12%), H-12(B)->L+1(B) (11%)                      | H-11(A)->L+1(A) (3%), H-10(A)->L+1(A) (2%), HOMO(A)->L+7(A) (2%), H-10(B)->L+1(B) (3%), H-9(B)->L+1(B) (4%), H-2(B)->L+3(B) (2%)                                                                                                                                                                                             |
| 264.9914359 | 0.0084 | H-12(A)->L+1(A) (33%), H-11(B)->L+1(B) (36%)                                             | H-14(A)->LUMO(A) (6%), H-11(A)->LUMO(A) (4%), H-11(A)->L+1(A) (3%), HOMO(A)->L+4(A) (2%), H-10(B)->LUMO(B) (5%), H-10(B)->L+1(B) (3%), HOMO(B)->L+5(B) (2%)                                                                                                                                                                  |
| 264.8895291 | 0.0055 | H-11(A)->L+1(A) (32%), H-10(B)->L+1(B) (32%)                                             | H-12(A)->LUMO(A) (3%), H-12(A)->L+1(A) (3%), H-3(A)->L+2(A) (3%), H-1(A)->L+2(A) (2%), H-11(B)->LUMO(B) (5%), H-11(B)->L+1(B) (3%), H-2(B)->L+3(B) (3%), HOMO(B)->L+8(B) (2%)                                                                                                                                                |
| 264.3868067 | 0.0022 | H-3(A)->L+2(A) (17%), HOMO(A)->L+7(A) (11%), H-2(B)->L+3(B) (20%), HOMO(B)->L+8(B) (10%) | H-11(A)->L+1(A) (4%), H-6(A)->L+2(A) (2%), H-1(A)->L+2(A) (7%), H-15(B)->LUMO(B) (2%), H-10(B)->L+1(B) (3%)                                                                                                                                                                                                                  |
| 262.9457775 | 0.0028 | H-14(A)->LUMO(A) (56%), H-12(B)->LUMO(B) (11%)                                           | H-15(A)->L+1(A) (6%), H-13(A)->LUMO(A) (3%), H-12(A)->L+1(A) (6%), H-14(B)->LUMO(B) (6%), H-11(B)->L+1(B) (2%)                                                                                                                                                                                                               |
| 259.957632  | 0.0005 | H-9(B)->L+2(B) (12%), H-8(B)->L+2(B) (58%)                                               | HOMO(A)->L+8(A) (6%), HOMO(A)->L+10(A) (2%), H-13(B)->LUMO(B) (2%), HOMO(B)->L+9(B) (7%), HOMO(B)->L+11(B) (2%)                                                                                                                                                                                                              |
| 259.1317832 | 0.0004 | H-13(A)->L+1(A) (15%), H-4(A)->L+2(A) (13%), H-13(B)->L+1(B) (17%), H-3(B)->L+3(B) (21%) | H-6(A)->L+2(A) (4%), H-3(A)->L+2(A) (2%), HOMO(A)->L+7(A) (3%), H-3(B)->L+11(B) (2%), HOMO(B)->L+8(B) (4%)                                                                                                                                                                                                                   |
| 257.2659785 | 0.0057 | H-10(B)->L+2(B) (91%)                                                                    | H-11(B)->L+1(B) (4%)                                                                                                                                                                                                                                                                                                         |
| 257.1165945 | 0.0051 | H-11(B)->L+2(B) (91%)                                                                    | H-10(B)->L+1(B) (4%)                                                                                                                                                                                                                                                                                                         |
| 255.7799043 | 0.0034 | H-14(B)->LUMO(B) (54%), HOMO(B)->L+10(B) (10%)                                           | H-14(A)->LUMO(A) (7%), HOMO(A)->L+7(A) (2%),                                                                                                                                                                                                                                                                                 |

|                    |        |                                                                       |                                                                                                                |
|--------------------|--------|-----------------------------------------------------------------------|----------------------------------------------------------------------------------------------------------------|
|                    |        |                                                                       | HOMO(A)->L+9(A) (7%), H-15(B)->L+1(B) (3%), HOMO(B)->L+8(B) (2%)                                               |
| <b>255.758799</b>  | 0.003  | HOMO(A)->L+7(A) (37%), HOMO(B)->L+8(B) (36%)                          | H-10(A)->L+1(A) (2%), H-15(B)->L+2(B) (2%), H-14(B)->LUMO(B) (2%), H-9(B)->L+1(B) (3%)                         |
| <b>255.7218732</b> | 0.002  | HOMO(A)->L+9(A) (21%), H-14(B)->LUMO(B) (20%), HOMO(B)->L+10(B) (30%) | H-14(A)->LUMO(A) (2%), H-3(A)->L+6(A) (2%), H-5(B)->L+7(B) (2%), H-2(B)->L+7(B) (2%)                           |
| <b>254.2796058</b> | 0.0268 | HOMO(A)->L+8(A) (37%), HOMO(A)->L+9(A) (10%), HOMO(B)->L+9(B) (38%)   | H-13(B)->LUMO(B) (2%), HOMO(B)->L+10(B) (6%)                                                                   |
| <b>253.3702395</b> | 0.0072 | HOMO(A)->L+9(A) (42%), HOMO(B)->L+10(B) (36%)                         | HOMO(A)->L+8(A) (7%), HOMO(B)->L+9(B) (9%)                                                                     |
| <b>251.4127406</b> | 0.0001 | H-2(A)->L+2(A) (74%), H-1(B)->L+3(B) (16%)                            |                                                                                                                |
| <b>250.7821619</b> | 0.0002 | H-5(A)->L+2(A) (15%), HOMO(A)->L+8(A) (14%), H-4(B)->L+3(B) (23%)     | H-2(A)->L+2(A) (3%), HOMO(A)->L+10(A) (9%), H-13(B)->LUMO(B) (3%), HOMO(B)->L+9(B) (4%), HOMO(B)->L+11(B) (5%) |

**Table S14.** Major and minor transitions calculated using TD-DFT studies of **Cu-4**.

| Wavelength (nm) | Osc. Strength | Major contribs                                                                                                      | Minor contribs                                                                                                                                                                                     |
|-----------------|---------------|---------------------------------------------------------------------------------------------------------------------|----------------------------------------------------------------------------------------------------------------------------------------------------------------------------------------------------|
| 731.9451739     | 0.0001        | HOMO(A)->LUMO(A) (47%), HOMO(B)->LUMO(B) (45%)                                                                      |                                                                                                                                                                                                    |
| 576.4293692     | 0             | HOMO(A)->L+1(A) (44%), HOMO(B)->L+1(B) (44%)                                                                        | H-3(A)->LUMO(A) (4%), H-2(B)->LUMO(B) (4%)                                                                                                                                                         |
| 540.5894616     | 0.0035        | H-16(B)->L+2(B) (37%), H-4(B)->L+2(B) (31%), HOMO(B)->L+2(B) (11%)                                                  | H-13(B)->L+2(B) (9%), H-4(B)->LUMO(B) (2%)                                                                                                                                                         |
| 506.7611911     | 0             | H-17(B)->L+2(B) (49%), H-3(B)->L+2(B) (24%)                                                                         | H-1(A)->LUMO(A) (7%), H-17(B)->LUMO(B) (2%), H-7(B)->L+2(B) (4%), H-5(B)->L+2(B) (4%), H-2(B)->L+2(B) (3%)                                                                                         |
| 501.8587048     | 0.2387        | HOMO(A)->LUMO(A) (28%), HOMO(B)->LUMO(B) (32%), HOMO(B)->L+2(B) (29%)                                               | H-16(B)->L+2(B) (4%), H-4(B)->L+2(B) (4%)                                                                                                                                                          |
| 488.3767007     | 0.0787        | H-14(B)->L+2(B) (14%), H-12(B)->L+2(B) (27%), HOMO(B)->L+2(B) (33%)                                                 | HOMO(A)->LUMO(A) (7%), H-16(B)->L+2(B) (2%), H-13(B)->L+2(B) (2%), HOMO(B)->LUMO(B) (7%)                                                                                                           |
| 480.5588876     | 0.1211        | HOMO(A)->LUMO(A) (10%), H-14(B)->L+2(B) (32%), H-12(B)->L+2(B) (15%), HOMO(B)->LUMO(B) (10%), HOMO(B)->L+2(B) (24%) | H-19(B)->L+2(B) (4%)                                                                                                                                                                               |
| 453.6394315     | 0.0015        | H-1(A)->LUMO(A) (87%)                                                                                               | H-17(B)->L+2(B) (4%), H-3(B)->L+2(B) (2%)                                                                                                                                                          |
| 453.5564567     | 0.0451        | H-23(B)->L+2(B) (25%), H-19(B)->L+2(B) (36%), H-12(B)->L+2(B) (11%)                                                 | H-1(A)->LUMO(A) (3%), HOMO(A)->LUMO(A) (2%), H-32(B)->L+2(B) (3%), H-16(B)->L+2(B) (3%), H-14(B)->L+2(B) (5%), HOMO(B)->LUMO(B) (2%), HOMO(B)->L+2(B) (2%)                                         |
| 433.480851      | 0.3488        | HOMO(A)->L+1(A) (47%), HOMO(B)->L+1(B) (45%)                                                                        | H-3(A)->LUMO(A) (2%), H-2(B)->LUMO(B) (2%)                                                                                                                                                         |
| 408.5550236     | 0             | H-5(A)->LUMO(A) (16%), H-4(B)->LUMO(B) (22%)                                                                        | H-7(A)->LUMO(A) (2%), H-6(A)->L+1(A) (3%), H-4(A)->L+1(A) (2%), H-3(A)->L+1(A) (7%), H-1(A)->L+1(A) (4%), HOMO(A)->L+2(A) (9%), H-3(B)->L+1(B) (4%), H-2(B)->L+1(B) (8%), HOMO(B)->L+3(B) (9%)     |
| 405.826955      | 0.0001        | H-3(A)->LUMO(A) (34%), H-2(B)->LUMO(B) (35%)                                                                        | H-8(A)->LUMO(A) (2%), H-6(A)->LUMO(A) (4%), H-5(A)->L+1(A) (2%), HOMO(A)->L+1(A) (3%), H-7(B)->LUMO(B) (2%), H-5(B)->LUMO(B) (2%), H-4(B)->L+1(B) (3%), H-3(B)->LUMO(B) (2%), HOMO(B)->L+1(B) (3%) |
| 394.8666932     | 0             | H-1(A)->L+1(A) (63%)                                                                                                | H-10(A)->LUMO(A) (3%), H-3(A)-                                                                                                                                                                     |

|             |        |                                                                                          |                                                                                                                                                                                                                                                                       |
|-------------|--------|------------------------------------------------------------------------------------------|-----------------------------------------------------------------------------------------------------------------------------------------------------------------------------------------------------------------------------------------------------------------------|
|             |        |                                                                                          | >L+1(A) (3%), HOMO(A)->L+2(A) (5%), H-9(B)->LUMO(B) (3%), H-7(B)->L+1(B) (2%), H-2(B)->L+1(B) (3%), HOMO(B)->L+3(B) (5%)                                                                                                                                              |
| 393.4382414 | 0.0011 | H-4(A)->LUMO(A) (23%), H-3(B)->LUMO(B) (33%)                                             | H-6(A)->LUMO(A) (6%), H-5(A)->L+1(A) (7%), H-3(A)->LUMO(A) (6%), HOMO(A)->L+1(A) (2%), H-4(B)->L+1(B) (9%), H-2(B)->LUMO(B) (3%), HOMO(B)->L+1(B) (2%)                                                                                                                |
| 385.7868972 | 0      | H-1(A)->L+1(A) (27%), H-4(B)->LUMO(B) (12%)                                              | H-8(A)->L+1(A) (3%), H-5(A)->LUMO(A) (9%), H-4(A)->L+1(A) (4%), H-3(A)->L+1(A) (4%), HOMO(A)->L+2(A) (7%), H-9(B)->LUMO(B) (2%), H-7(B)->L+1(B) (3%), H-3(B)->L+1(B) (4%), H-2(B)->L+1(B) (3%), HOMO(B)->L+3(B) (7%)                                                  |
| 378.4621276 | 0      | H-8(A)->LUMO(A) (21%), H-7(B)->LUMO(B) (21%)                                             | H-12(A)->L+4(A) (2%), H-11(A)->L+3(A) (2%), H-10(A)->L+1(A) (8%), H-9(A)->L+1(A) (2%), H-8(A)->L+2(A) (2%), H-5(A)->L+1(A) (2%), H-11(B)->L+5(B) (2%), H-10(B)->L+4(B) (2%), H-9(B)->L+1(B) (8%), H-8(B)->L+1(B) (3%), H-7(B)->L+3(B) (2%), H-4(B)->L+1(B) (2%)       |
| 372.4926934 | 0.0007 | H-2(A)->LUMO(A) (94%)                                                                    | H-1(B)->LUMO(B) (3%)                                                                                                                                                                                                                                                  |
| 368.9786114 | 0.002  | H-1(B)->LUMO(B) (94%)                                                                    | H-2(A)->LUMO(A) (3%)                                                                                                                                                                                                                                                  |
| 364.2629874 | 0.0001 | H-8(A)->L+1(A) (10%), H-7(B)->L+1(B) (10%), H-3(B)->L+1(B) (13%)                         | H-13(A)->LUMO(A) (2%), H-10(A)->LUMO(A) (9%), H-9(A)->LUMO(A) (2%), H-6(A)->L+1(A) (2%), H-4(A)->L+1(A) (7%), H-3(A)->L+1(A) (6%), HOMO(A)->L+2(A) (2%), H-13(B)->LUMO(B) (2%), H-9(B)->LUMO(B) (9%), H-8(B)->LUMO(B) (2%), H-2(B)->L+1(B) (4%), HOMO(B)->L+3(B) (2%) |
| 351.4191577 | 0.3881 | H-3(A)->LUMO(A) (33%), H-2(B)->LUMO(B) (34%), H-2(B)->L+2(B) (19%)                       | H-4(A)->LUMO(A) (2%)                                                                                                                                                                                                                                                  |
| 348.8581683 | 0.0001 | H-3(A)->L+1(A) (11%), H-2(A)->L+6(A) (10%), H-2(B)->L+1(B) (11%), H-1(B)->L+7(B) (10%)   | H-9(A)->L+8(A) (2%), H-7(A)->L+9(A) (4%), H-6(A)->L+5(A) (2%), H-2(A)->L+5(A) (3%), HOMO(A)->L+2(A) (7%), H-8(B)->L+9(B) (2%), H-6(B)->L+10(B) (4%), H-5(B)->L+6(B) (3%), H-1(B)->L+6(B) (3%), HOMO(B)->L+3(B) (7%)                                                   |
| 344.7644542 | 0.0002 | H-3(A)->L+1(A) (11%), HOMO(A)->L+2(A) (11%), H-2(B)->L+1(B) (11%), HOMO(B)->L+3(B) (11%) | H-7(A)->L+9(A) (3%), H-4(A)->L+1(A) (2%), H-2(A)->L+5(A) (3%), H-2(A)->L+6(A) (7%), HOMO(A)->LUMO(A) (2%), H-6(B)->L+10(B) (3%), H-5(B)->L+1(B) (2%), H-5(B)->L+6(B) (2%), H-1(B)->L+6(B) (2%), H-1(B)->L+7(B) (7%), HOMO(B)->LUMO(B) (2%)                            |
| 343.3228838 | 0.0857 | H-2(B)->L+2(B) (63%)                                                                     | H-4(A)->LUMO(A) (5%), H-3(A)->LUMO(A) (7%), H-7(B)->L+2(B) (5%), H-                                                                                                                                                                                                   |



|             |        |                                                                                              |                                                                                                                                                                                                                                                                                                                                                                       |
|-------------|--------|----------------------------------------------------------------------------------------------|-----------------------------------------------------------------------------------------------------------------------------------------------------------------------------------------------------------------------------------------------------------------------------------------------------------------------------------------------------------------------|
|             |        |                                                                                              | 5(B)->L+2(B) (2%), H-3(B)->LUMO(B) (2%), H-2(B)->LUMO(B) (9%)                                                                                                                                                                                                                                                                                                         |
| 337.5464676 | 0.0032 | H-4(A)->L+1(A) (13%), H-4(B)->LUMO(B) (29%), H-3(B)->L+1(B) (19%)                            | H-10(A)->LUMO(A) (2%), H-6(A)->L+1(A) (5%), H-5(A)->L+2(A) (2%), H-2(A)->L+1(A) (3%), H-9(B)->LUMO(B) (3%), H-4(B)->L+3(B) (3%), H-2(B)->L+1(B) (4%), H-1(B)->L+1(B) (3%)                                                                                                                                                                                             |
| 335.4187669 | 0.0004 | H-2(A)->L+9(A) (13%), H-1(B)->L+10(B) (13%)                                                  | H-9(A)->L+3(A) (2%), H-9(A)->L+5(A) (3%), H-9(A)->L+6(A) (2%), H-7(A)->L+5(A) (3%), H-7(A)->L+6(A) (7%), H-6(A)->LUMO(A) (3%), H-6(A)->L+8(A) (3%), H-5(A)->L+6(A) (2%), H-4(A)->L+8(A) (2%), H-2(A)->L+1(A) (2%), H-8(B)->L+4(B) (2%), H-8(B)->L+6(B) (3%), H-8(B)->L+7(B) (2%), H-6(B)->L+6(B) (3%), H-6(B)->L+7(B) (9%), H-5(B)->LUMO(B) (3%), H-5(B)->L+9(B) (5%) |
| 334.5950425 | 0.0004 | H-2(A)->L+1(A) (56%), H-1(B)->L+1(B) (27%)                                                   | H-2(B)->L+1(B) (3%)                                                                                                                                                                                                                                                                                                                                                   |
| 333.9011985 | 0.0017 | H-5(A)->LUMO(A) (31%), H-4(B)->LUMO(B) (14%), H-1(B)->L+1(B) (22%)                           | H-10(A)->LUMO(A) (2%), H-3(A)->L+1(A) (6%), H-2(A)->L+1(A) (8%), H-3(B)->L+1(B) (5%), H-2(B)->L+1(B) (7%)                                                                                                                                                                                                                                                             |
| 332.593468  | 0      | H-5(A)->LUMO(A) (14%), H-2(A)->L+1(A) (25%), H-1(B)->L+1(B) (42%)                            | H-7(A)->LUMO(A) (3%), H-4(B)->LUMO(B) (6%), H-3(B)->L+1(B) (2%), H-2(B)->L+1(B) (3%)                                                                                                                                                                                                                                                                                  |
| 329.8153677 | 0.4529 | H-4(A)->LUMO(A) (19%), H-3(B)->LUMO(B) (49%)                                                 | H-6(A)->LUMO(A) (8%), H-5(A)->L+1(A) (4%), H-3(A)->LUMO(A) (5%), HOMO(A)->L+1(A) (2%), H-2(B)->LUMO(B) (3%)                                                                                                                                                                                                                                                           |
| 328.1220373 | 0.0495 | H-5(A)->L+1(A) (11%), H-4(A)->LUMO(A) (21%), H-4(B)->L+1(B) (39%)                            | H-10(A)->L+1(A) (3%), H-6(A)->LUMO(A) (2%), H-9(B)->L+1(B) (3%), H-3(B)->LUMO(B) (2%), H-3(B)->L+3(B) (2%), H-2(B)->LUMO(B) (2%), H-2(B)->L+3(B) (2%)                                                                                                                                                                                                                 |
| 325.3153679 | 0.0476 | H-5(A)->LUMO(A) (13%), H-3(A)->L+1(A) (39%), H-2(B)->L+1(B) (32%)                            | H-6(A)->L+1(A) (3%), H-4(A)->L+1(A) (2%), H-4(B)->LUMO(B) (5%)                                                                                                                                                                                                                                                                                                        |
| 324.6169372 | 0.0008 | H-12(A)->L+1(A) (15%), H-11(A)->LUMO(A) (29%), H-11(B)->L+1(B) (14%), H-10(B)->LUMO(B) (24%) | H-11(A)->L+2(A) (2%), H-10(B)->L+3(B) (2%)                                                                                                                                                                                                                                                                                                                            |
| 324.5404628 | 0.0006 | H-12(A)->LUMO(A) (30%), H-11(A)->L+1(A) (15%), H-11(B)->LUMO(B) (26%), H-10(B)->L+1(B) (14%) | H-12(A)->L+2(A) (2%), H-11(B)->L+3(B) (2%)                                                                                                                                                                                                                                                                                                                            |
| 320.1823025 | 0.008  | H-6(A)->LUMO(A) (60%), H-4(A)->LUMO(A) (17%)                                                 | H-3(A)->LUMO(A) (2%), H-5(B)->LUMO(B) (6%), H-4(B)->L+1(B) (2%)                                                                                                                                                                                                                                                                                                       |
| 319.3658055 | 0.0005 | H-7(A)->LUMO(A) (79%)                                                                        | H-5(A)->LUMO(A) (6%), H-2(A)->L+1(A) (2%), H-6(B)->LUMO(B) (7%)                                                                                                                                                                                                                                                                                                       |

|                    |        |                                                                                                         |                                                                                                                                                                                                                                                                                                                                                                                                                                                   |
|--------------------|--------|---------------------------------------------------------------------------------------------------------|---------------------------------------------------------------------------------------------------------------------------------------------------------------------------------------------------------------------------------------------------------------------------------------------------------------------------------------------------------------------------------------------------------------------------------------------------|
| <b>317.6719696</b> | 0.0324 | H-6(B)->LUMO(B) (10%),<br>H-5(B)->LUMO(B) (73%)                                                         | H-6(A)->LUMO(A) (6%), H-4(A)-<br>>LUMO(A) (3%), H-3(B)->LUMO(B) (2%)                                                                                                                                                                                                                                                                                                                                                                              |
| <b>316.8601115</b> | 0.0089 | H-6(B)->LUMO(B) (77%)                                                                                   | H-7(A)->LUMO(A) (8%), H-5(B)-<br>>LUMO(B) (8%)                                                                                                                                                                                                                                                                                                                                                                                                    |
| <b>315.9557427</b> | 0.0024 | H-1(B)->L+2(B) (95%)                                                                                    | H-5(B)->LUMO(B) (2%), H-2(B)->L+2(B)<br>(2%)                                                                                                                                                                                                                                                                                                                                                                                                      |
| <b>307.5386159</b> | 0.004  | H-4(A)->L+1(A) (26%),<br>HOMO(A)->L+2(A)<br>(16%), H-3(B)->L+1(B)<br>(27%), HOMO(B)->L+3(B)<br>(15%)    | H-6(A)->L+1(A) (7%)                                                                                                                                                                                                                                                                                                                                                                                                                               |
| <b>307.4471025</b> | 0.018  | H-5(A)->L+1(A) (50%), H-<br>4(B)->L+1(B) (33%)                                                          | H-10(A)->L+1(A) (2%), H-7(A)->L+1(A)<br>(4%), H-6(A)->LUMO(A) (2%)                                                                                                                                                                                                                                                                                                                                                                                |
| <b>302.1646349</b> | 0.0065 | H-17(B)->L+2(B) (15%),<br>H-7(B)->L+2(B) (10%), H-<br>3(B)->L+2(B) (59%)                                | H-7(B)->LUMO(B) (6%)                                                                                                                                                                                                                                                                                                                                                                                                                              |
| <b>297.3384647</b> | 0.0023 | H-9(A)->LUMO(A) (47%),<br>H-6(A)->L+1(A) (12%), H-<br>8(B)->LUMO(B) (11%)                               | H-10(A)->LUMO(A) (7%), H-4(A)-<br>>L+1(A) (4%), H-2(A)->L+6(A) (2%), H-<br>5(B)->L+1(B) (6%), H-1(B)->L+7(B) (2%)                                                                                                                                                                                                                                                                                                                                 |
| <b>296.081655</b>  | 0.1291 | H-10(A)->LUMO(A)<br>(13%), H-9(A)->LUMO(A)<br>(10%), H-9(B)->LUMO(B)<br>(18%), H-8(B)->LUMO(B)<br>(10%) | H-11(A)->LUMO(A) (6%), H-8(A)-<br>>L+1(A) (2%), H-6(A)->L+1(A) (2%),<br>HOMO(A)->L+2(A) (2%), H-16(B)-<br>>L+2(B) (2%), H-12(B)->LUMO(B) (3%),<br>H-10(B)->LUMO(B) (6%), H-5(B)->L+1(B)<br>(2%), H-4(B)->L+2(B) (5%), HOMO(B)-<br>>L+3(B) (2%)                                                                                                                                                                                                    |
| <b>295.5804916</b> | 0.011  | H-7(B)->LUMO(B) (13%)                                                                                   | H-12(A)->LUMO(A) (2%), H-12(A)-<br>>L+4(A) (5%), H-11(A)->L+3(A) (4%), H-<br>10(A)->LUMO(A) (2%), H-9(A)-<br>>LUMO(A) (2%), H-8(A)->LUMO(A)<br>(7%), HOMO(A)->L+3(A) (5%),<br>HOMO(A)->L+7(A) (2%), H-17(B)-<br>>L+2(B) (3%), H-11(B)->L+5(B) (5%), H-<br>10(B)->L+4(B) (4%), H-8(B)->LUMO(B)<br>(5%), H-5(B)->L+1(B) (5%), H-4(B)-<br>>L+2(B) (2%), H-3(B)->L+2(B) (6%),<br>HOMO(B)->L+4(B) (3%), HOMO(B)-<br>>L+6(B) (2%), HOMO(B)->L+8(B) (2%) |
| <b>295.5452624</b> | 0.0383 | H-8(B)->LUMO(B) (18%),<br>H-5(B)->L+1(B) (15%)                                                          | H-12(A)->L+4(A) (2%), H-10(A)-<br>>LUMO(A) (5%), H-9(A)->LUMO(A)<br>(6%), H-8(A)->LUMO(A) (2%), H-6(A)-<br>>L+1(A) (3%), HOMO(A)->L+2(A) (4%),<br>H-16(B)->L+2(B) (2%), H-9(B)->LUMO(B)<br>(5%), H-7(B)->LUMO(B) (4%), H-4(B)-<br>>L+2(B) (6%), H-3(B)->L+2(B) (2%),<br>HOMO(B)->L+3(B) (4%)                                                                                                                                                      |
| <b>294.7022724</b> | 0.0166 | H-12(A)->LUMO(A)<br>(17%), H-8(A)->LUMO(A)<br>(26%), H-11(B)-<br>>LUMO(B) (21%), H-7(B)-                | H-11(A)->L+1(A) (3%), HOMO(A)-<br>>L+5(A) (2%), H-10(B)->L+1(B) (4%),<br>HOMO(B)->L+4(B) (3%)                                                                                                                                                                                                                                                                                                                                                     |

|                    |        |                                                                                              |                                                                                                                                                                                                                                                                          |
|--------------------|--------|----------------------------------------------------------------------------------------------|--------------------------------------------------------------------------------------------------------------------------------------------------------------------------------------------------------------------------------------------------------------------------|
|                    |        | >LUMO(B) (13%)                                                                               |                                                                                                                                                                                                                                                                          |
| <b>293.9616213</b> | 0.0079 | H-16(B)->L+2(B) (16%),<br>H-4(B)->L+2(B) (35%)                                               | H-11(A)->LUMO(A) (5%), H-9(A)->LUMO(A) (4%), H-13(B)->L+2(B) (4%), H-10(B)->LUMO(B) (6%), H-9(B)->L+2(B) (4%), H-8(B)->LUMO(B) (5%), H-5(B)->L+1(B) (7%)                                                                                                                 |
| <b>293.238554</b>  | 0.0737 | H-11(A)->LUMO(A) (17%), H-9(A)->LUMO(A) (13%), H-6(A)->L+1(A) (10%), H-10(B)->LUMO(B) (14%)  | H-12(A)->L+1(A) (2%), H-3(A)->L+1(A) (2%), HOMO(A)->L+2(A) (7%), HOMO(A)->L+4(A) (4%), H-11(B)->L+1(B) (3%), H-9(B)->LUMO(B) (2%), H-8(B)->LUMO(B) (8%), H-3(B)->L+1(B) (4%), HOMO(B)->L+3(B) (5%), HOMO(B)->L+5(B) (2%)                                                 |
| <b>292.8160999</b> | 0.0002 | H-10(A)->LUMO(A) (18%), H-9(B)->LUMO(B) (15%)                                                | H-12(A)->L+3(A) (5%), H-12(A)->L+5(A) (2%), H-11(A)->L+4(A) (7%), H-6(A)->L+1(A) (3%), H-5(A)->LUMO(A) (2%), H-13(B)->LUMO(B) (2%), H-12(B)->LUMO(B) (2%), H-11(B)->L+4(B) (6%), H-11(B)->L+6(B) (2%), H-10(B)->LUMO(B) (5%), H-10(B)->L+5(B) (7%), HOMO(B)->L+5(B) (3%) |
| <b>292.4431385</b> | 0.0003 | H-7(A)->L+1(A) (24%), H-8(B)->LUMO(B) (11%), H-6(B)->L+1(B) (24%)                            | H-9(A)->LUMO(A) (2%), H-6(A)->L+1(A) (8%), H-5(A)->L+1(A) (3%), H-4(A)->L+1(A) (4%), H-5(B)->L+1(B) (7%)                                                                                                                                                                 |
| <b>292.1468296</b> | 0.0001 | H-7(A)->L+1(A) (18%), H-6(A)->L+1(A) (12%), H-8(B)->LUMO(B) (16%), H-6(B)->L+1(B) (17%)      | H-9(A)->LUMO(A) (5%), H-4(A)->L+1(A) (6%), H-5(B)->L+1(B) (9%)                                                                                                                                                                                                           |
| <b>290.7355915</b> | 0.0039 | H-12(A)->LUMO(A) (15%), H-8(A)->LUMO(A) (24%), H-11(B)->LUMO(B) (15%), H-7(B)->LUMO(B) (23%) | H-11(A)->L+1(A) (2%), HOMO(A)->L+3(A) (6%), H-10(B)->L+1(B) (2%), HOMO(B)->L+4(B) (4%)                                                                                                                                                                                   |
| <b>290.0554287</b> | 0.0071 | H-7(A)->L+1(A) (18%), H-6(A)->L+1(A) (11%), H-6(B)->L+1(B) (21%), H-5(B)->L+1(B) (22%)       | H-10(A)->LUMO(A) (3%), H-5(A)->L+1(A) (2%), H-4(A)->L+1(A) (7%), H-9(B)->LUMO(B) (4%), H-3(B)->L+1(B) (2%)                                                                                                                                                               |
| <b>289.560916</b>  | 0.0068 | H-7(A)->L+1(A) (25%), H-6(B)->L+1(B) (28%), H-5(B)->L+1(B) (14%)                             | H-10(A)->LUMO(A) (4%), H-6(A)->L+1(A) (6%), H-5(A)->L+1(A) (2%), H-4(A)->L+1(A) (6%), H-9(B)->LUMO(B) (5%)                                                                                                                                                               |
| <b>288.2682934</b> | 0.0001 | HOMO(A)->L+5(A) (15%), HOMO(A)->L+6(A) (17%), HOMO(B)->L+6(B) (24%), HOMO(B)->L+7(B) (33%)   | H-7(A)->L+1(A) (2%), HOMO(B)->L+4(B) (2%)                                                                                                                                                                                                                                |
| <b>287.5862707</b> | 0.0019 | HOMO(A)->L+4(A) (11%), HOMO(B)->L+3(B) (12%), HOMO(B)->L+5(B) (11%)                          | H-11(A)->LUMO(A) (9%), H-10(A)->LUMO(A) (3%), H-4(A)->L+1(A) (4%), HOMO(A)->L+2(A) (7%), H-12(B)->LUMO(B) (9%), H-10(B)->LUMO(B)                                                                                                                                         |

|             |        |                                                                                                                                          |                                                                                                                                                                                                                                                                     |
|-------------|--------|------------------------------------------------------------------------------------------------------------------------------------------|---------------------------------------------------------------------------------------------------------------------------------------------------------------------------------------------------------------------------------------------------------------------|
|             |        |                                                                                                                                          | (3%), H-9(B)->LUMO(B) (6%), H-4(B)->L+2(B) (2%), H-3(B)->L+1(B) (4%)                                                                                                                                                                                                |
| 287.0735442 | 0.0087 | HOMO(A)->L+4(A) (25%), HOMO(B)->L+5(B) (25%)                                                                                             | H-10(A)->LUMO(A) (9%), H-4(A)->L+1(A) (2%), HOMO(A)->L+2(A) (6%), HOMO(A)->L+6(A) (2%), H-10(B)->LUMO(B) (6%), HOMO(B)->L+3(B) (2%)                                                                                                                                 |
| 286.967233  | 0.0002 | HOMO(A)->L+3(A) (31%), HOMO(B)->L+4(B) (38%)                                                                                             | H-8(A)->LUMO(A) (2%), H-8(A)->L+4(A) (2%), HOMO(A)->L+5(A) (4%), H-7(B)->L+5(B) (2%), HOMO(B)->L+6(B) (3%)                                                                                                                                                          |
| 286.3574682 | 0.001  | HOMO(A)->L+5(A) (20%), HOMO(A)->L+6(A) (35%), HOMO(B)->L+7(B) (25%)                                                                      | HOMO(B)->L+6(B) (9%)                                                                                                                                                                                                                                                |
| 285.414809  | 0.0002 | HOMO(A)->L+5(A) (15%), HOMO(A)->L+6(A) (21%), HOMO(B)->L+6(B) (25%), HOMO(B)->L+7(B) (22%)                                               |                                                                                                                                                                                                                                                                     |
| 283.7166888 | 0.0185 | H-12(B)->LUMO(B) (49%)                                                                                                                   | H-14(A)->LUMO(A) (5%), H-12(A)->L+3(A) (2%), H-11(A)->L+4(A) (2%), H-10(A)->LUMO(A) (2%), H-15(B)->L+1(B) (6%), H-14(B)->LUMO(B) (2%), H-11(B)->L+4(B) (2%), H-10(B)->L+5(B) (2%), H-9(B)->LUMO(B) (4%), H-7(B)->L+1(B) (2%), HOMO(B)->L+5(B) (6%)                  |
| 282.5142255 | 0.0148 | HOMO(A)->L+3(A) (19%), HOMO(A)->L+5(A) (18%), HOMO(A)->L+6(A) (16%), HOMO(B)->L+4(B) (15%), HOMO(B)->L+6(B) (14%), HOMO(B)->L+7(B) (11%) |                                                                                                                                                                                                                                                                     |
| 280.3423168 | 0.0054 | H-7(B)->L+1(B) (26%)                                                                                                                     | H-13(A)->LUMO(A) (4%), H-12(A)->L+3(A) (5%), H-11(A)->L+4(A) (6%), H-8(A)->L+1(A) (9%), H-13(B)->LUMO(B) (2%), H-12(B)->LUMO(B) (2%), H-11(B)->L+4(B) (5%), H-10(B)->L+5(B) (6%), H-9(B)->LUMO(B) (6%), H-8(B)->LUMO(B) (2%)                                        |
| 279.9372161 | 0.0001 | H-2(A)->L+5(A) (14%), H-1(B)->L+6(B) (14%)                                                                                               | H-7(A)->L+8(A) (4%), H-2(A)->L+3(A) (7%), H-2(A)->L+6(A) (7%), H-2(A)->L+7(A) (2%), H-12(B)->LUMO(B) (2%), H-7(B)->L+1(B) (2%), H-6(B)->L+9(B) (4%), H-5(B)->L+2(B) (8%), H-5(B)->L+7(B) (2%), H-1(B)->L+4(B) (7%), H-1(B)->L+7(B) (6%)                             |
| 279.8045474 | 0.0005 | H-5(B)->L+2(B) (75%)                                                                                                                     | H-2(A)->L+5(A) (2%), H-7(B)->L+2(B) (5%), H-3(B)->L+2(B) (2%), H-2(B)->L+2(B) (5%), H-1(B)->L+6(B) (2%)                                                                                                                                                             |
| 278.8166614 | 0.0007 | H-10(A)->L+1(A) (13%), H-9(B)->L+1(B) (20%)                                                                                              | H-12(A)->L+4(A) (6%), H-11(A)->L+3(A) (4%), H-9(A)->L+1(A) (4%), H-8(A)->LUMO(A) (5%), H-1(A)->L+2(A) (2%), H-15(B)->LUMO(B) (3%), H-12(B)->L+1(B) (3%), H-11(B)->L+5(B) (6%), H-10(B)->L+4(B) (4%), H-8(B)->L+1(B) (7%), H-7(B)->LUMO(B) (6%), H-5(B)->L+2(B) (2%) |

|                    |        |                                                                                            |                                                                                                                                                                                                                                                                                                                                                                                                                                        |
|--------------------|--------|--------------------------------------------------------------------------------------------|----------------------------------------------------------------------------------------------------------------------------------------------------------------------------------------------------------------------------------------------------------------------------------------------------------------------------------------------------------------------------------------------------------------------------------------|
| <b>278.1785798</b> | 0.018  | HOMO(A)->L+3(A) (24%), HOMO(A)->L+5(A) (15%), HOMO(B)->L+4(B) (23%), HOMO(B)->L+6(B) (14%) | H-12(A)->LUMO(A) (7%), HOMO(A)->L+6(A) (3%), H-11(B)->LUMO(B) (8%), HOMO(B)->L+7(B) (3%)                                                                                                                                                                                                                                                                                                                                               |
| <b>278.0351019</b> | 0.0043 | HOMO(A)->L+4(A) (41%), HOMO(B)->L+5(B) (36%)                                               | H-11(A)->LUMO(A) (6%), H-10(B)->LUMO(B) (6%), H-6(B)->L+2(B) (4%)                                                                                                                                                                                                                                                                                                                                                                      |
| <b>276.9606242</b> | 0.0167 | H-6(B)->L+2(B) (88%)                                                                       | HOMO(B)->L+5(B) (2%)                                                                                                                                                                                                                                                                                                                                                                                                                   |
| <b>276.1033137</b> | 0.1601 | H-8(A)->L+1(A) (24%), H-7(B)->L+1(B) (35%)                                                 | H-13(A)->LUMO(A) (5%), H-13(B)->LUMO(B) (8%), H-9(B)->LUMO(B) (3%), H-9(B)->L+2(B) (2%), H-6(B)->L+2(B) (3%), HOMO(B)->L+3(B) (2%), HOMO(B)->L+11(B) (2%)                                                                                                                                                                                                                                                                              |
| <b>276.0418413</b> | 0.0036 | H-1(A)->L+2(A) (11%), H-15(B)->LUMO(B) (24%), H-12(B)->L+1(B) (16%)                        | H-15(A)->LUMO(A) (7%), H-14(A)->L+1(A) (4%), H-12(A)->L+4(A) (2%), H-11(A)->L+3(A) (2%), H-10(A)->L+1(A) (2%), HOMO(A)->L+7(A) (3%), H-14(B)->L+1(B) (2%), H-11(B)->L+5(B) (2%), H-10(B)->L+4(B) (2%), H-5(B)->L+2(B) (2%), HOMO(B)->L+8(B) (3%)                                                                                                                                                                                       |
| <b>274.422738</b>  | 0.0499 | H-13(A)->LUMO(A) (12%), H-8(A)->L+1(A) (35%), H-13(B)->LUMO(B) (11%)                       | H-10(A)->LUMO(A) (4%), HOMO(A)->L+2(A) (2%), HOMO(A)->L+8(A) (3%), HOMO(A)->L+10(A) (2%), HOMO(B)->L+3(B) (2%), HOMO(B)->L+9(B) (2%)                                                                                                                                                                                                                                                                                                   |
| <b>273.8106336</b> | 0.0008 | H-9(A)->L+1(A) (27%), H-9(B)->L+1(B) (10%), H-8(B)->L+1(B) (21%)                           | H-10(A)->L+1(A) (9%), H-7(A)->L+6(A) (2%), H-2(A)->L+9(A) (3%), HOMO(A)->L+7(A) (2%), H-6(B)->L+7(B) (2%), H-1(B)->L+10(B) (3%), HOMO(B)->L+8(B) (2%)                                                                                                                                                                                                                                                                                  |
| <b>272.7384963</b> | 0.0005 | HOMO(A)->L+7(A) (19%), HOMO(B)->L+8(B) (20%)                                               | H-10(A)->L+1(A) (2%), H-9(A)->L+1(A) (7%), H-3(A)->L+2(A) (7%), H-1(A)->L+2(A) (3%), H-15(B)->LUMO(B) (3%), H-8(B)->L+1(B) (6%), H-2(B)->L+3(B) (7%)                                                                                                                                                                                                                                                                                   |
| <b>272.6785129</b> | 0.0004 |                                                                                            | H-13(A)->LUMO(A) (3%), H-9(A)->L+8(A) (4%), H-8(A)->L+1(A) (3%), H-6(A)->L+3(A) (2%), H-6(A)->L+5(A) (4%), H-6(A)->L+6(A) (2%), H-4(A)->L+1(A) (2%), H-4(A)->L+5(A) (3%), H-3(A)->L+5(A) (2%), H-2(A)->L+5(A) (3%), H-2(A)->L+6(A) (7%), H-13(B)->LUMO(B) (3%), H-8(B)->L+9(B) (4%), H-5(B)->L+1(B) (3%), H-5(B)->L+4(B) (3%), H-5(B)->L+6(B) (7%), H-5(B)->L+7(B) (3%), H-2(B)->L+6(B) (2%), H-1(B)->L+6(B) (3%), H-1(B)->L+7(B) (7%) |
| <b>271.4249283</b> | 0.0681 | H-9(A)->L+1(A) (38%), H-8(B)->L+1(B) (40%)                                                 | H-10(A)->L+1(A) (6%), H-1(A)->L+2(A) (2%), HOMO(A)->L+7(A) (2%), H-7(B)->L+2(B) (4%), HOMO(B)->L+8(B) (2%)                                                                                                                                                                                                                                                                                                                             |

|                    |        |                                                                                              |                                                                                                                                                                                                                                                                                                                              |
|--------------------|--------|----------------------------------------------------------------------------------------------|------------------------------------------------------------------------------------------------------------------------------------------------------------------------------------------------------------------------------------------------------------------------------------------------------------------------------|
| <b>270.849775</b>  | 0.0295 | H-9(B)->L+2(B) (64%), H-8(B)->L+2(B) (17%)                                                   | H-7(B)->L+1(B) (5%), H-4(B)->L+2(B) (5%)                                                                                                                                                                                                                                                                                     |
| <b>270.0768794</b> | 0.0303 | H-10(A)->L+1(A) (32%), H-9(B)->L+1(B) (21%), H-7(B)->L+2(B) (15%)                            | H-9(A)->L+1(A) (7%), HOMO(A)->L+7(A) (2%), H-17(B)->L+2(B) (3%), H-8(B)->L+1(B) (9%), HOMO(B)->L+8(B) (2%)                                                                                                                                                                                                                   |
| <b>269.7067501</b> | 0.0035 | H-9(B)->L+1(B) (15%), H-7(B)->L+2(B) (47%)                                                   | H-10(A)->L+1(A) (5%), H-1(A)->L+2(A) (8%), H-17(B)->L+2(B) (7%), H-5(B)->L+2(B) (3%), H-2(B)->L+2(B) (2%)                                                                                                                                                                                                                    |
| <b>268.8995251</b> | 0      | H-12(A)->LUMO(A) (16%), H-11(A)->L+1(A) (30%), H-11(B)->LUMO(B) (17%), H-10(B)->L+1(B) (27%) | H-11(B)->L+2(B) (2%)                                                                                                                                                                                                                                                                                                         |
| <b>268.6722712</b> | 0      | H-12(A)->L+1(A) (30%), H-11(A)->LUMO(A) (16%), H-11(B)->L+1(B) (26%), H-10(B)->LUMO(B) (17%) | H-10(B)->L+2(B) (2%)                                                                                                                                                                                                                                                                                                         |
| <b>267.0231586</b> | 0.0006 | H-2(A)->L+8(A) (16%), H-1(B)->L+9(B) (16%)                                                   | H-9(A)->L+6(A) (2%), H-7(A)->L+1(A) (3%), H-7(A)->L+3(A) (3%), H-7(A)->L+5(A) (8%), H-7(A)->L+6(A) (3%), H-6(A)->L+9(A) (2%), H-2(A)->L+10(A) (3%), H-1(A)->L+2(A) (5%), H-8(B)->L+7(B) (2%), H-6(B)->L+1(B) (2%), H-6(B)->L+4(B) (4%), H-6(B)->L+6(B) (8%), H-6(B)->L+7(B) (4%), H-5(B)->L+10(B) (2%), H-1(B)->L+11(B) (3%) |
| <b>266.1575961</b> | 0.0097 | H-1(A)->L+2(A) (42%), H-15(B)->LUMO(B) (12%), H-12(B)->L+1(B) (11%)                          | H-11(A)->L+1(A) (3%), H-10(A)->L+1(A) (2%), HOMO(A)->L+7(A) (2%), H-10(B)->L+1(B) (3%), H-9(B)->L+1(B) (4%), H-2(B)->L+3(B) (2%)                                                                                                                                                                                             |
| <b>264.9914359</b> | 0.0084 | H-12(A)->L+1(A) (33%), H-11(B)->L+1(B) (36%)                                                 | H-14(A)->LUMO(A) (6%), H-11(A)->LUMO(A) (4%), H-11(A)->L+1(A) (3%), HOMO(A)->L+4(A) (2%), H-10(B)->LUMO(B) (5%), H-10(B)->L+1(B) (3%), HOMO(B)->L+5(B) (2%)                                                                                                                                                                  |
| <b>264.8895291</b> | 0.0055 | H-11(A)->L+1(A) (32%), H-10(B)->L+1(B) (32%)                                                 | H-12(A)->LUMO(A) (3%), H-12(A)->L+1(A) (3%), H-3(A)->L+2(A) (3%), H-1(A)->L+2(A) (2%), H-11(B)->LUMO(B) (5%), H-11(B)->L+1(B) (3%), H-2(B)->L+3(B) (3%), HOMO(B)->L+8(B) (2%)                                                                                                                                                |
| <b>264.3868067</b> | 0.0022 | H-3(A)->L+2(A) (17%), HOMO(A)->L+7(A) (11%), H-2(B)->L+3(B) (20%), HOMO(B)->L+8(B) (10%)     | H-11(A)->L+1(A) (4%), H-6(A)->L+2(A) (2%), H-1(A)->L+2(A) (7%), H-15(B)->LUMO(B) (2%), H-10(B)->L+1(B) (3%)                                                                                                                                                                                                                  |
| <b>262.9457775</b> | 0.0028 | H-14(A)->LUMO(A) (56%), H-12(B)->LUMO(B) (11%)                                               | H-15(A)->L+1(A) (6%), H-13(A)->LUMO(A) (3%), H-12(A)->L+1(A) (6%), H-14(B)->LUMO(B) (6%), H-11(B)->L+1(B) (2%)                                                                                                                                                                                                               |

|                    |        |                                                                                          |                                                                                                                 |
|--------------------|--------|------------------------------------------------------------------------------------------|-----------------------------------------------------------------------------------------------------------------|
| <b>259.957632</b>  | 0.0005 | H-9(B)->L+2(B) (12%), H-8(B)->L+2(B) (58%)                                               | HOMO(A)->L+8(A) (6%), HOMO(A)->L+10(A) (2%), H-13(B)->LUMO(B) (2%), HOMO(B)->L+9(B) (7%), HOMO(B)->L+11(B) (2%) |
| <b>259.1317832</b> | 0.0004 | H-13(A)->L+1(A) (15%), H-4(A)->L+2(A) (13%), H-13(B)->L+1(B) (17%), H-3(B)->L+3(B) (21%) | H-6(A)->L+2(A) (4%), H-3(A)->L+2(A) (2%), HOMO(A)->L+7(A) (3%), H-3(B)->L+11(B) (2%), HOMO(B)->L+8(B) (4%)      |
| <b>257.2659785</b> | 0.0057 | H-10(B)->L+2(B) (91%)                                                                    | H-11(B)->L+1(B) (4%)                                                                                            |
| <b>257.1165945</b> | 0.0051 | H-11(B)->L+2(B) (91%)                                                                    | H-10(B)->L+1(B) (4%)                                                                                            |
| <b>255.7799043</b> | 0.0034 | H-14(B)->LUMO(B) (54%), HOMO(B)->L+10(B) (10%)                                           | H-14(A)->LUMO(A) (7%), HOMO(A)->L+7(A) (2%), HOMO(A)->L+9(A) (7%), H-15(B)->L+1(B) (3%), HOMO(B)->L+8(B) (2%)   |
| <b>255.758799</b>  | 0.003  | HOMO(A)->L+7(A) (37%), HOMO(B)->L+8(B) (36%)                                             | H-10(A)->L+1(A) (2%), H-15(B)->L+2(B) (2%), H-14(B)->LUMO(B) (2%), H-9(B)->L+1(B) (3%)                          |
| <b>255.7218732</b> | 0.002  | HOMO(A)->L+9(A) (21%), H-14(B)->LUMO(B) (20%), HOMO(B)->L+10(B) (30%)                    | H-14(A)->LUMO(A) (2%), H-3(A)->L+6(A) (2%), H-5(B)->L+7(B) (2%), H-2(B)->L+7(B) (2%)                            |
| <b>254.2796058</b> | 0.0268 | HOMO(A)->L+8(A) (37%), HOMO(A)->L+9(A) (10%), HOMO(B)->L+9(B) (38%)                      | H-13(B)->LUMO(B) (2%), HOMO(B)->L+10(B) (6%)                                                                    |
| <b>253.3702395</b> | 0.0072 | HOMO(A)->L+9(A) (42%), HOMO(B)->L+10(B) (36%)                                            | HOMO(A)->L+8(A) (7%), HOMO(B)->L+9(B) (9%)                                                                      |
| <b>251.4127406</b> | 0.0001 | H-2(A)->L+2(A) (74%), H-1(B)->L+3(B) (16%)                                               |                                                                                                                 |
| <b>250.7821619</b> | 0.0002 | H-5(A)->L+2(A) (15%), HOMO(A)->L+8(A) (14%), H-4(B)->L+3(B) (23%)                        | H-2(A)->L+2(A) (3%), HOMO(A)->L+10(A) (9%), H-13(B)->LUMO(B) (3%), HOMO(B)->L+9(B) (4%), HOMO(B)->L+11(B) (5%)  |

### Catalysis studies:

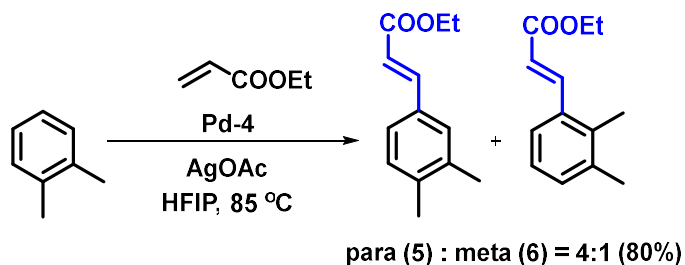

The substrate for example *o*-xylene (30  $\mu$ L, 0.25 mmol) was dissolved in hexafluoroisopropanol (HFIP, 2 mL). To the mixture ethyl acrylate (53  $\mu$ L, 0.50 mmol), Silver acetate (83 mg, 0.50 mmol) and **Pd-4** catalyst (0-5 mol%) was added (Table S4) to optimize the ideal condition. The reaction mixture was stirred for 24 h at 85 °C. The reaction was monitored by TLC analysis where formation of a new non-polar UV-active spot was observed corresponding to the product. The reaction mixture was passed through celite resin followed by silica-gel column chromatography (Ethyl acetate/Pet ether = 5/95).



**Table S15.** Amount of catalyst added and yield of product obtained.

| <b>Amount of Pd-4<br/>catalyst (mol%)</b> | <b>Yield<br/>(%)</b> |
|-------------------------------------------|----------------------|
| 0                                         | <5                   |
| 0.5                                       | 39                   |
| 1                                         | 51                   |
| 1.5                                       | 63                   |
| 2                                         | 68                   |
| 2.5                                       | 75                   |
| 3                                         | 80                   |
| 4                                         | 79                   |
| 5                                         | 82                   |

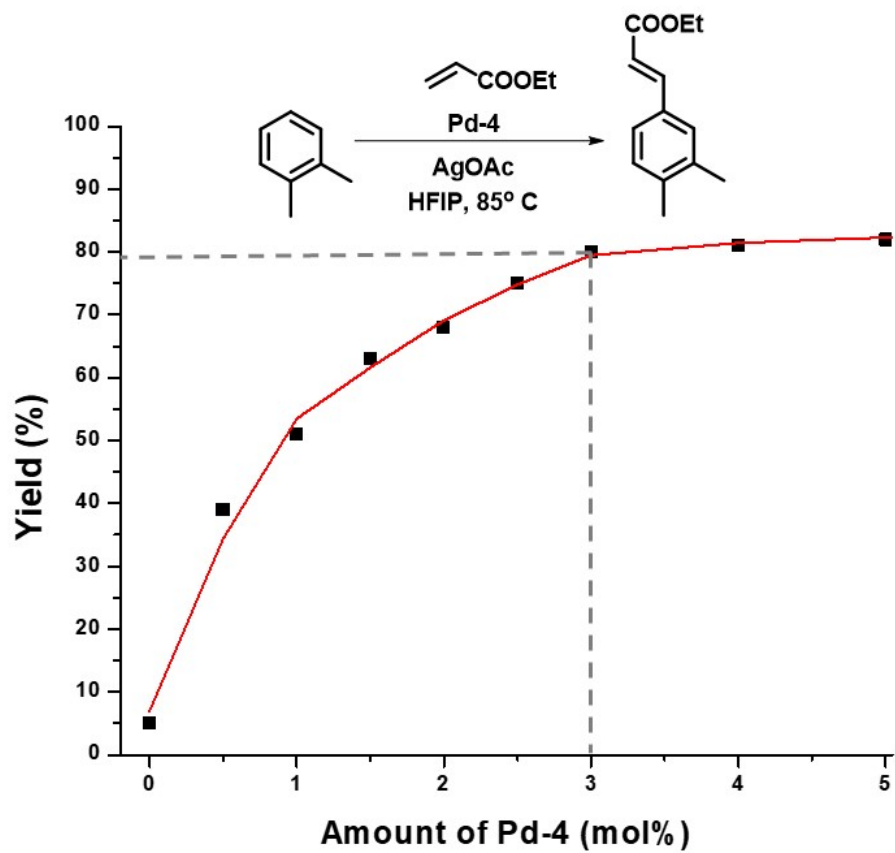

Figure S21. Schematic representation of yield of product formed upon change in amount of Pd-4.

**Table S16.** Optimization of solvent and oxidant.

| Substrate                                                                         | Substrate                                                                         | Oxidant              | Solvent        | Product                                                                           | Temperature | Yield (%) |
|-----------------------------------------------------------------------------------|-----------------------------------------------------------------------------------|----------------------|----------------|-----------------------------------------------------------------------------------|-------------|-----------|
|  |  | AgOAc                | HFIP           |  | 85 °C       | 80        |
|  |  | AgOAc                | Dichloroethane |  | 85 °C       | 20        |
|  |  | AgOAc                | THF            |  | 70 °C       | NA        |
|  |  | Cu(OAc) <sub>2</sub> | HFIP           |  | 85 °C       | < 5       |
|  |  | FeCl <sub>3</sub>    | HFIP           |  | 85 °C       | < 5       |

**Table S17.** Control reactions.

| Substrate                                                                           | Substrate                                                                           | Oxidant | Solvent | Catalyst                   | Temperature | Yield (%) |
|-------------------------------------------------------------------------------------|-------------------------------------------------------------------------------------|---------|---------|----------------------------|-------------|-----------|
|    |    | AgOAc   | HFIP    | No                         | 85 °C       | < 5       |
|    |    | AgOAc   | HFIP    | <b>4</b> (3 mol%)          | 85 °C       | < 5       |
|    |    | AgOAc   | HFIP    | PdCl <sub>2</sub> (3 mol%) | 85 °C       | 38        |
|    |    | AgOAc   | HFIP    | <b>Cu-4</b> (3 mol%)       | 85 °C       | < 5       |
|    |    | AgOAc   | HFIP    | <b>Ni-4</b> (3 mol%)       | 85 °C       | < 5       |
|  |  | AgOAc   | HFIP    | <b>Pd-4</b> (3 mol%)       | 85 °C       | 80        |

General reaction scheme

The substrate, ***o*-xylene** (30  $\mu$ L, 0.25 mmol) was dissolved in hexafluoroisopropanol (HFIP, 2 mL). To the mixture ethyl acrylate (53  $\mu$ L, 0.50 mmol), Silver acetate (83 mg, 0.50 mmol) and **Pd-4** catalyst (3 mol%) was added and the reaction mixture was stirred for 24 h at 85 °C. The reaction was monitored by TLC analysis where formation of a new non-polar UV-active spot was observed corresponding to the product. The reaction mixture was passed through celite resin followed by silica-gel column chromatography (Ethyl acetate/Pet ether = 5/95).

**6**; Yield = 80% (40 mg) <sup>1</sup>H NMR (400 MHz, CDCl<sub>3</sub>)  $\delta$  = 7.67 (d, J = 16.0 Hz, 1H), 7.33 (s, 1H), 7.31 (s, 1H), 7.17 (d, J = 7.8 Hz, 1H), 6.41 (d, J = 16.0 Hz, 1H), 4.32 – 4.24 (m, 2H), 2.30 (s,

6H), 1.36 (t, J = 7.1 Hz, 5H).  $^{13}\text{C}$  NMR (126 MHz,  $\text{CDCl}_3$ )  $\delta$  = 167.31, 167.31, 144.82, 139.40, 137.11, 130.16, 129.29, 125.69, 116.96, 60.39, 19.81, 19.79, 14.36.

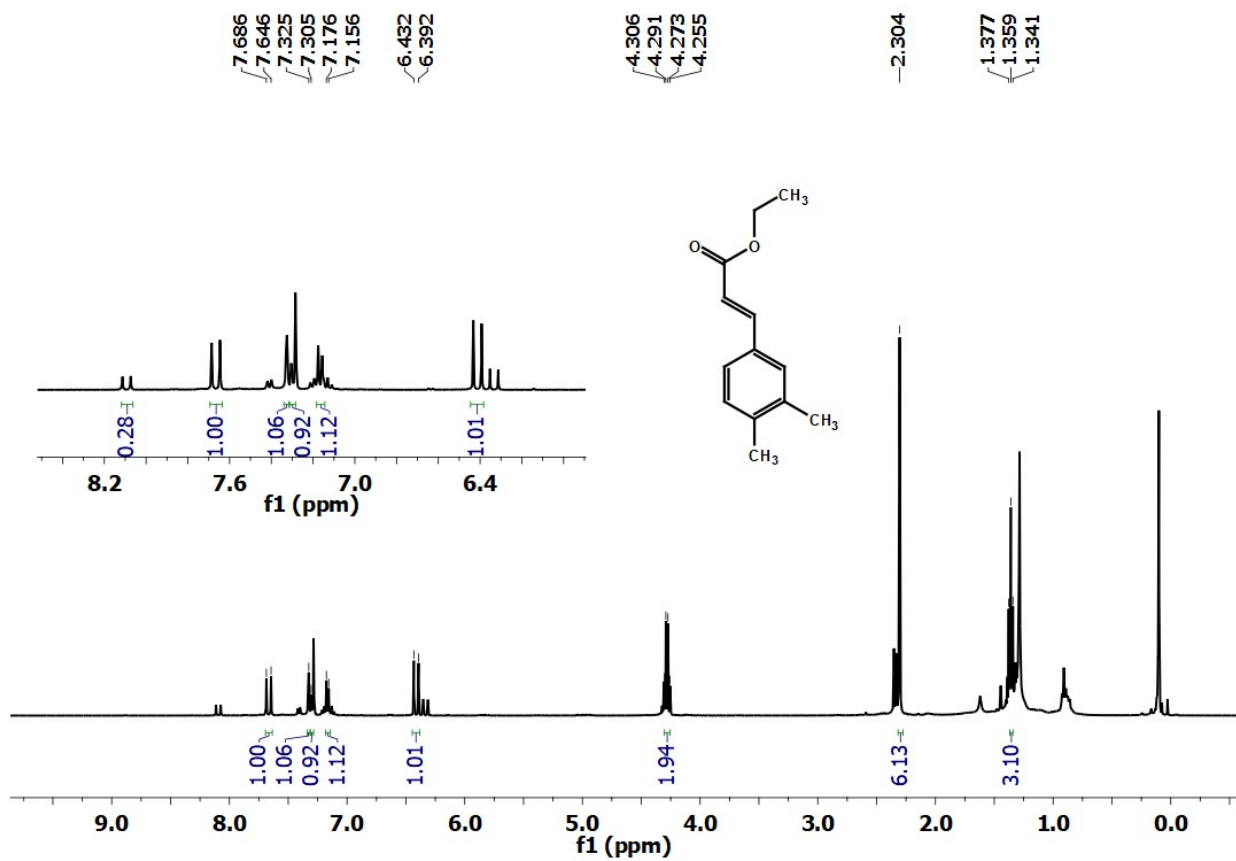

**Figure S22.**  $^1\text{H}$ -NMR spectrum of **6** in  $\text{CDCl}_3$  on 400 MHz instrument at room temperature. Note: Peaks marked with asterisk (\*) are due to residual solvents.

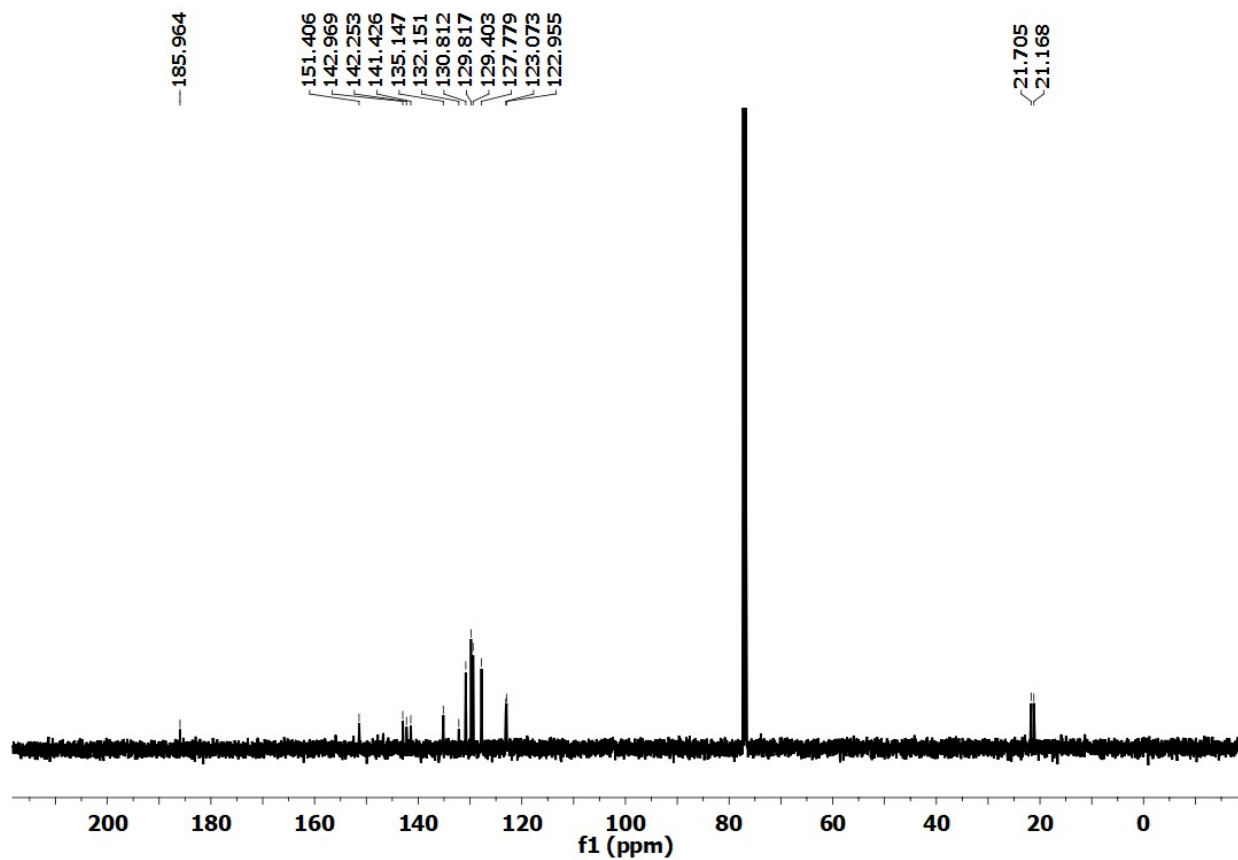

**Figure S23.**  $^{13}\text{C}$ -NMR spectrum of **6** in  $\text{CDCl}_3$  on 400 MHz instrument at room temperature. Note: Peaks marked with asterisk (\*) are due to residual solvents.
